# Supplementary material for: Meta-Profiles of Gene Expression during Aging: Limited Similarities between Mouse and Human and an Unexpectedly Decreased Inflammatory Signature
Source: PubMed Central journal article supplement (PMC3296693; doi:10.1371/journal.pone.0033204), 2012-03-07
Supplement: pone.0033204.s001.pdf [file pone.0033204.s001.pdf]

(A)

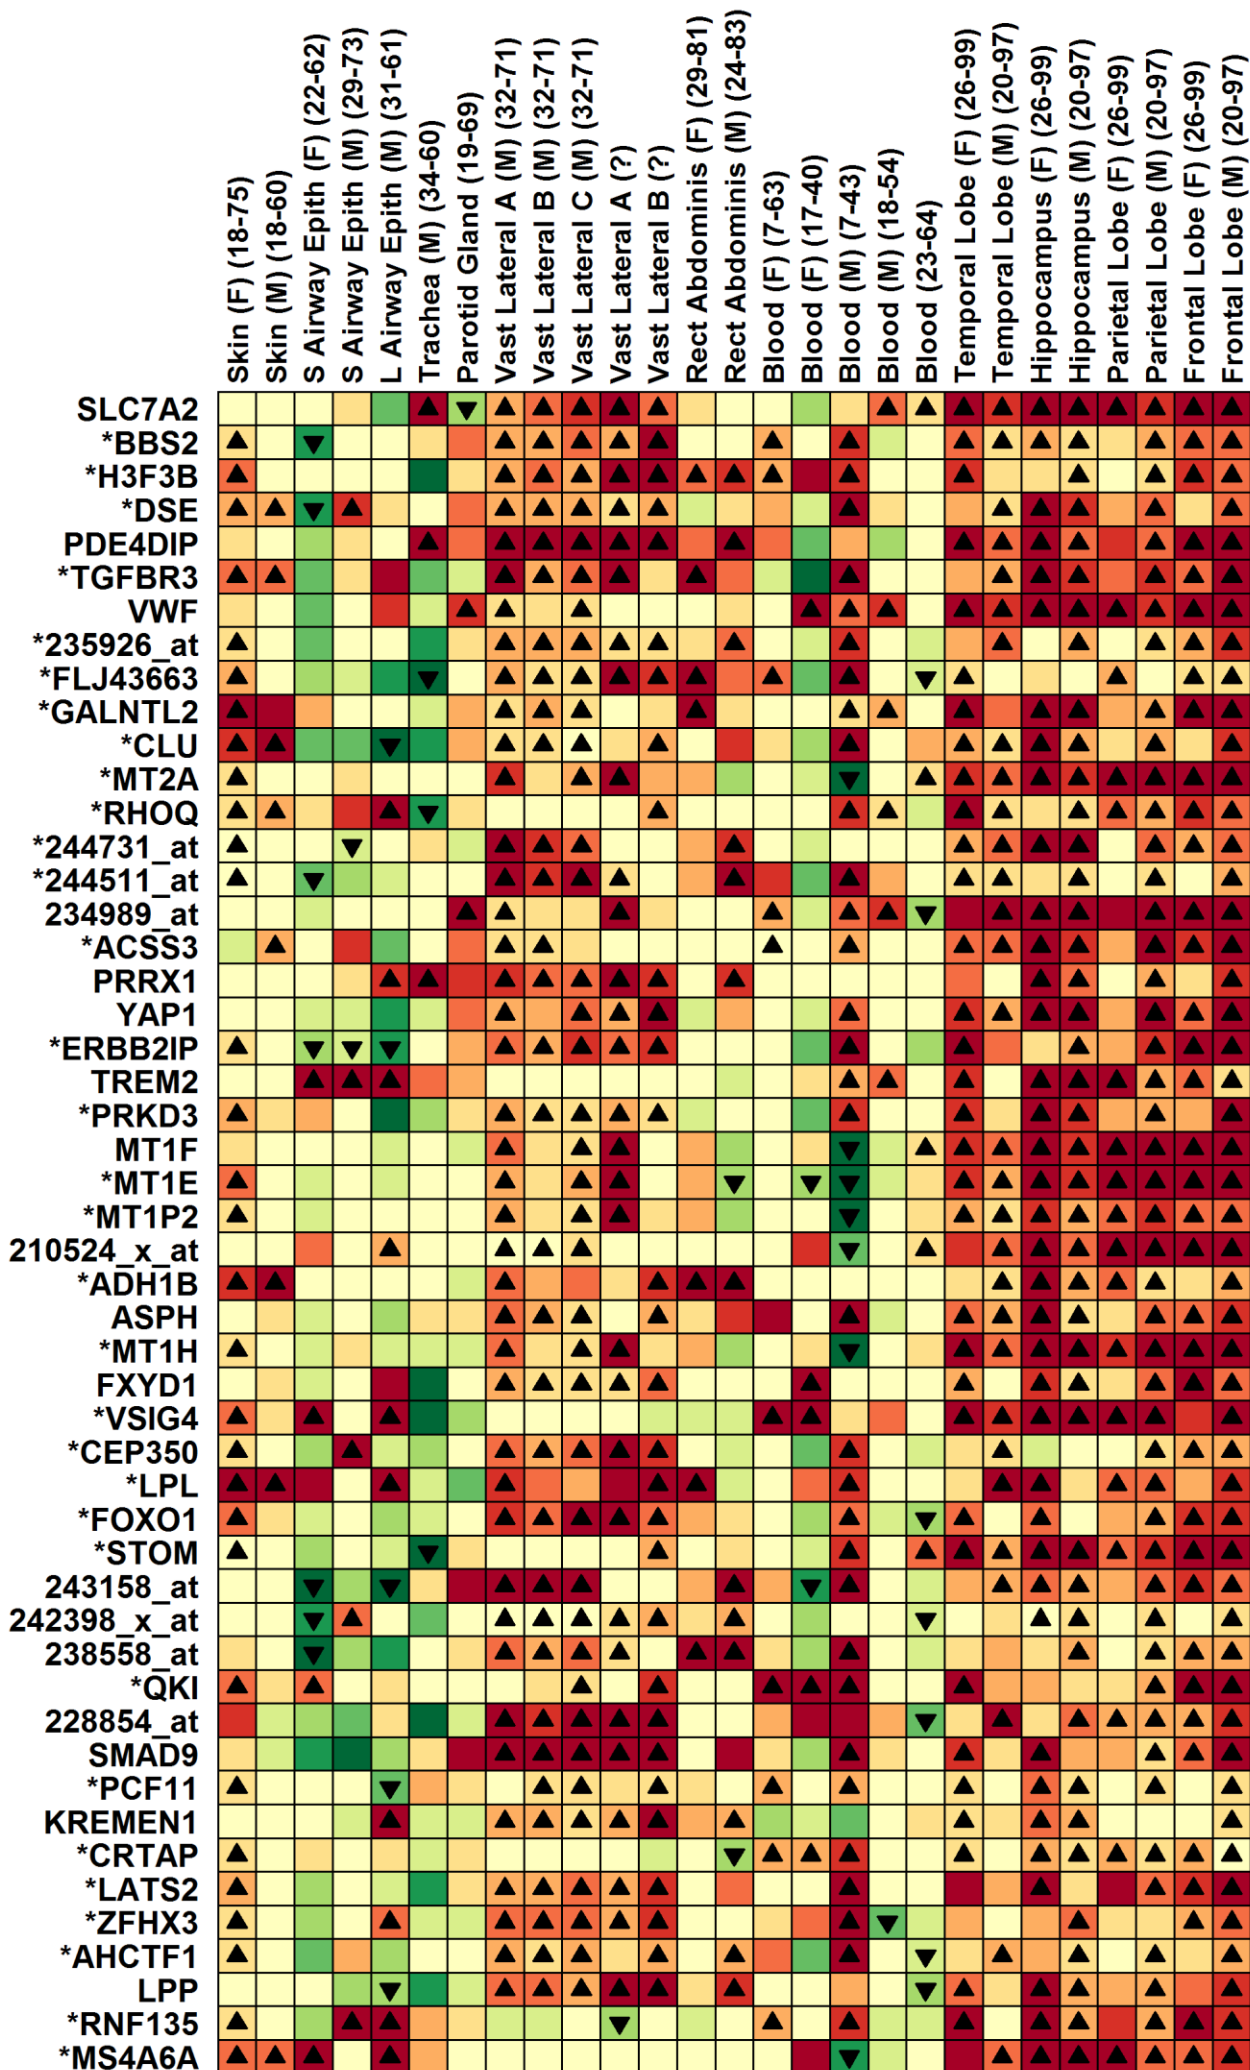

40-Year  
Fold Change  
(Old / Young)

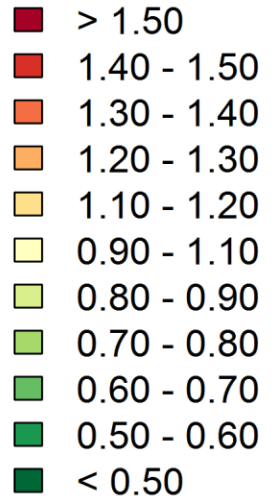

(B)

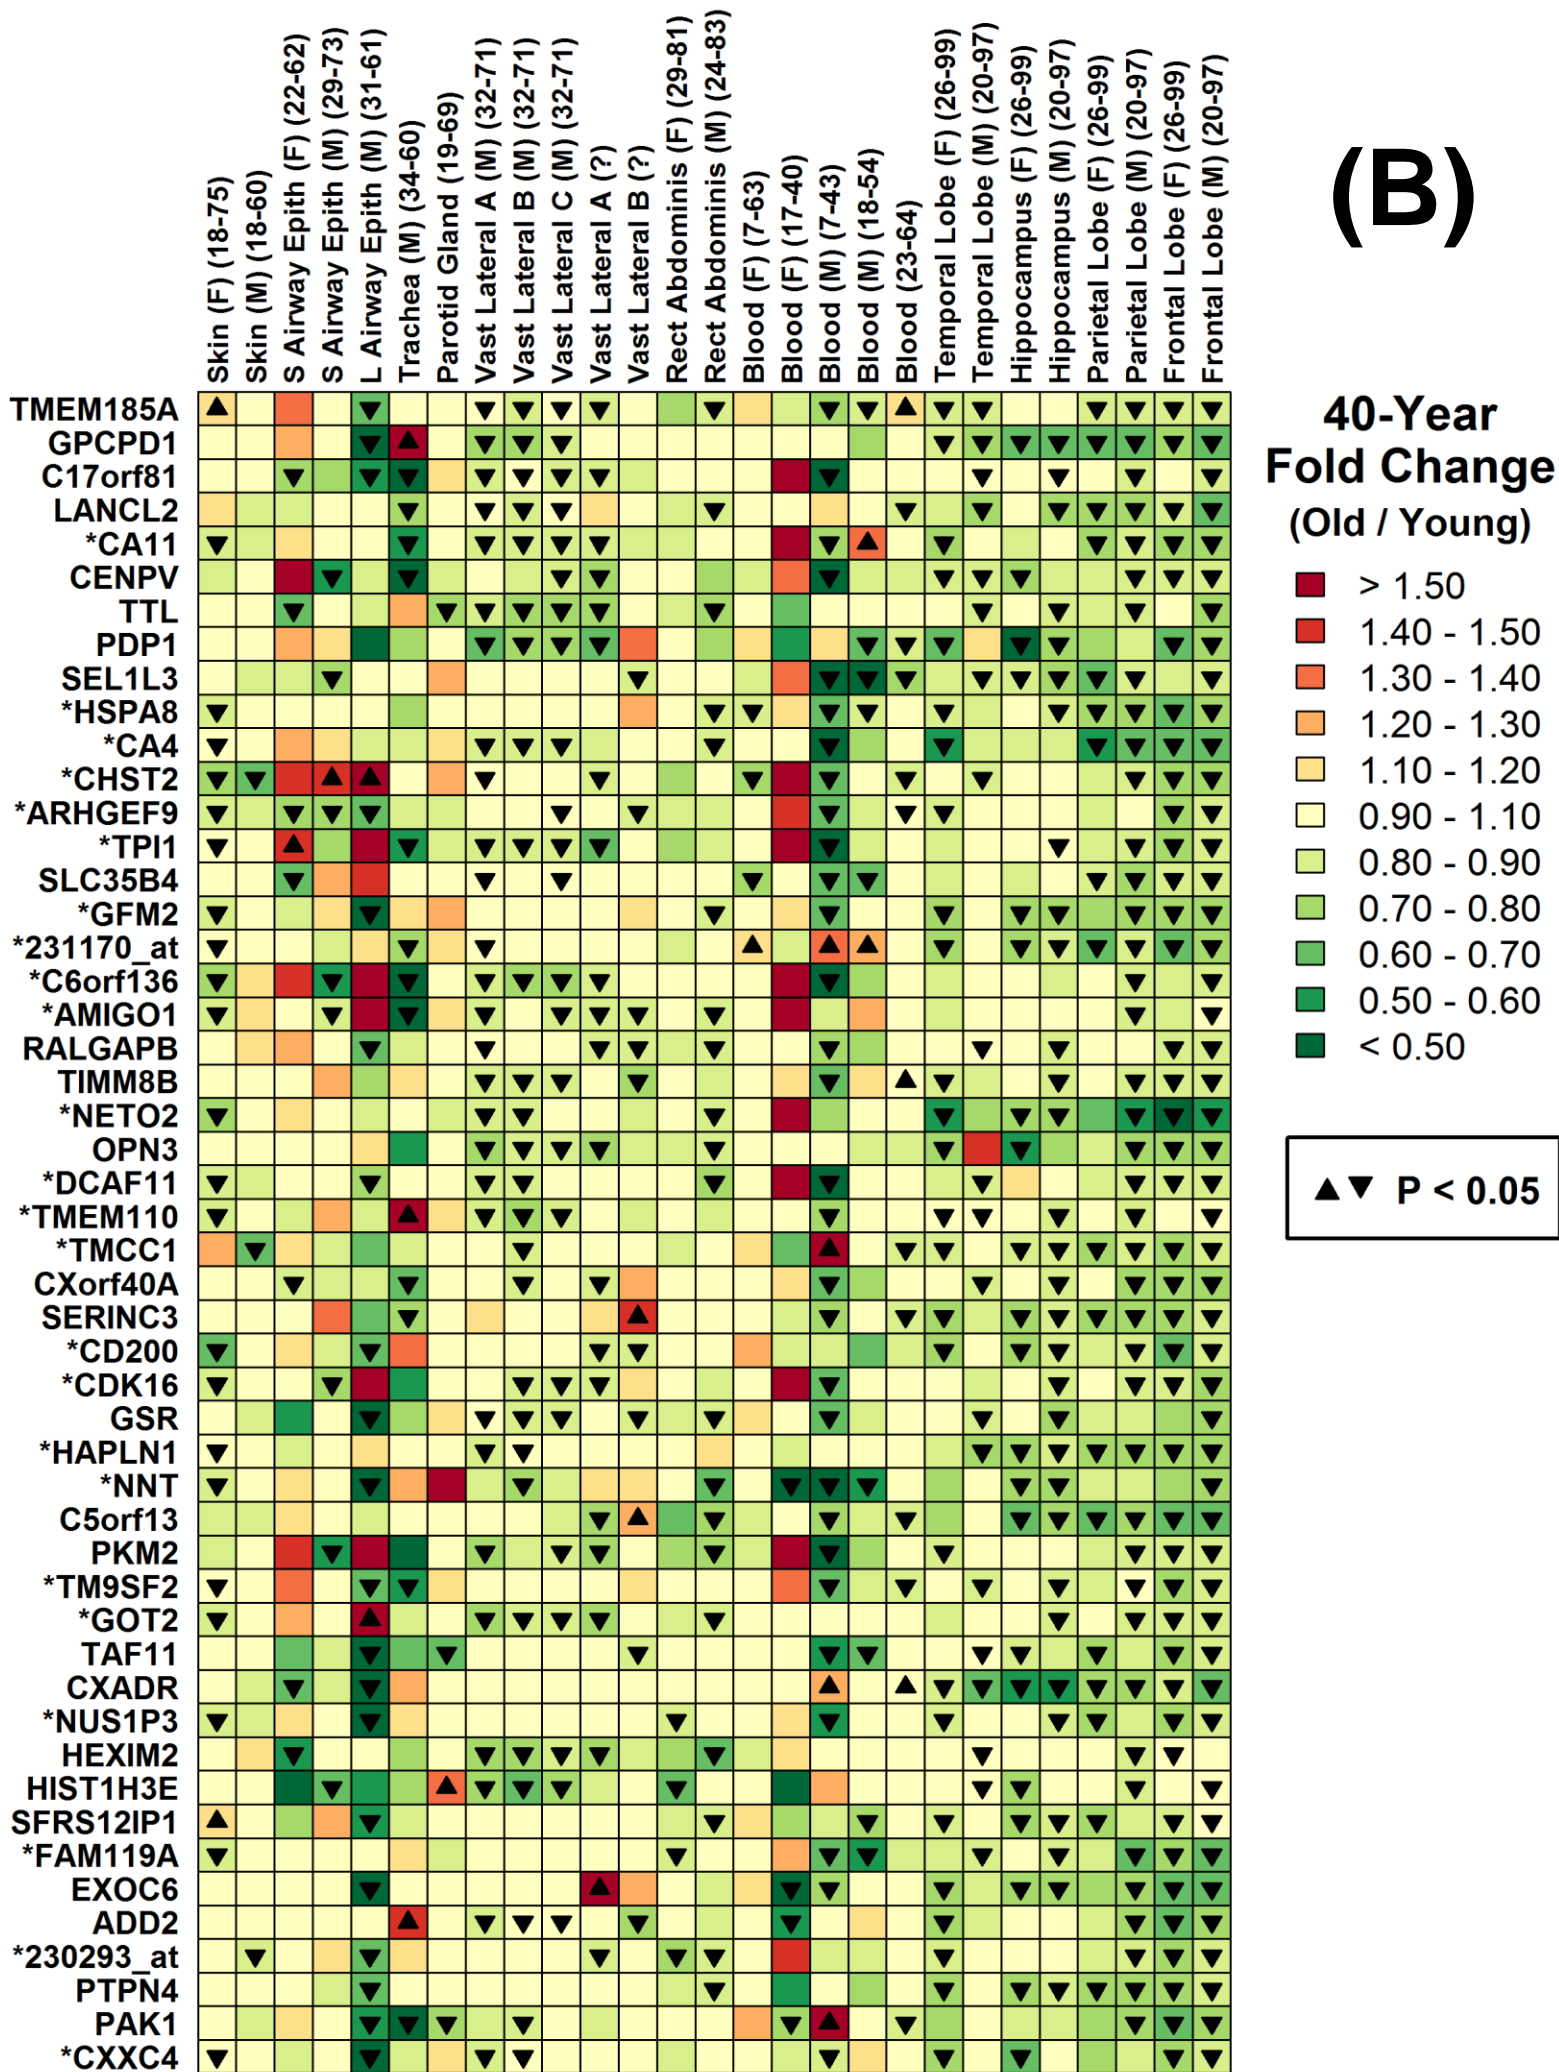

(C)

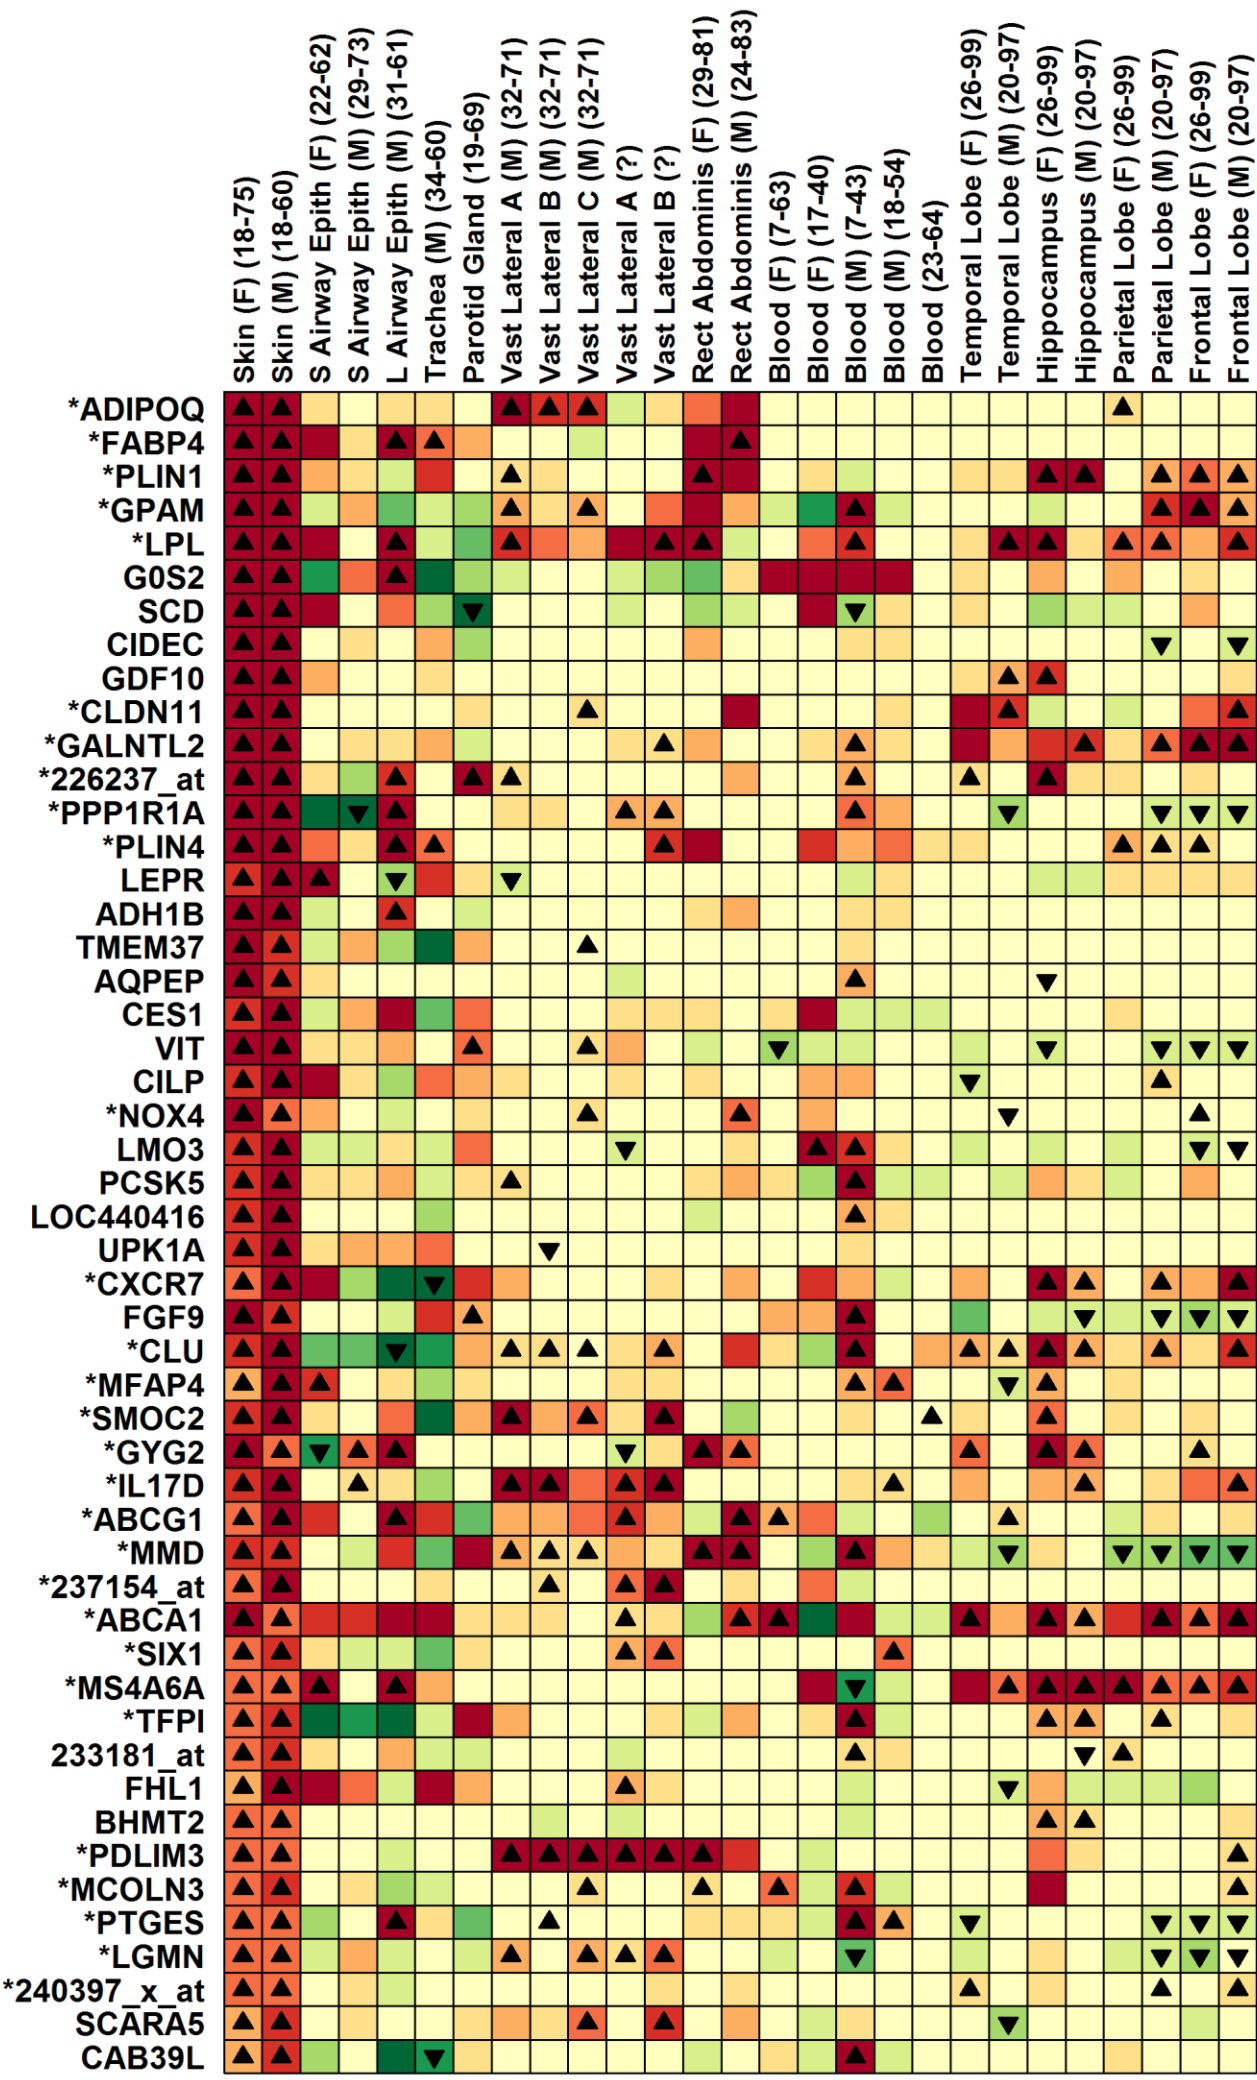

40-Year  
Fold Change  
(Old / Young)

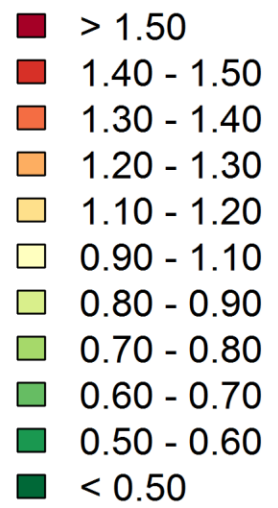

▲ ▼  $P < 0.05$

(D)

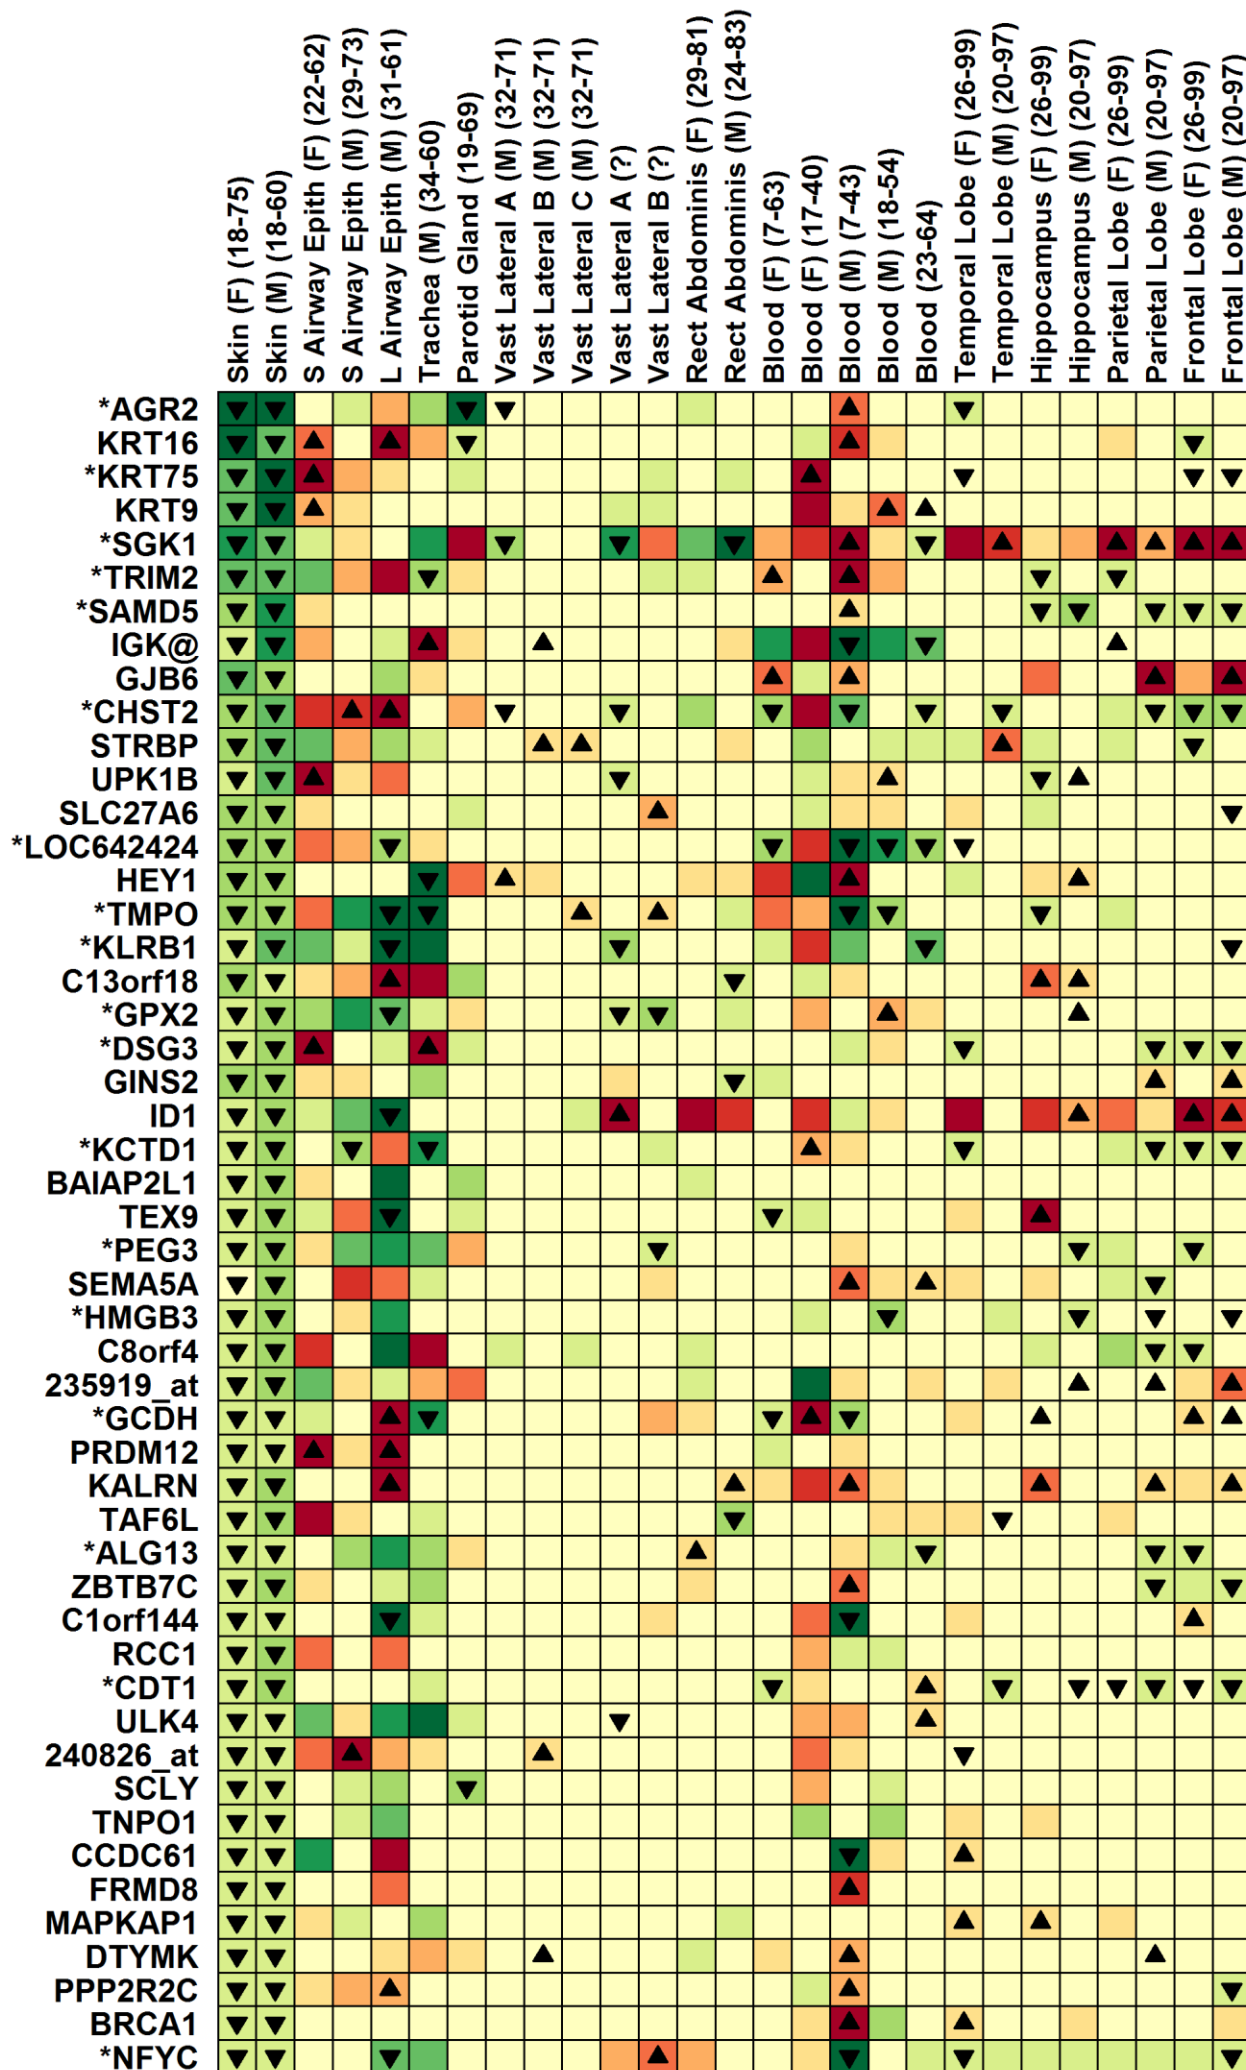

40-Year  
Fold Change  
(Old / Young)

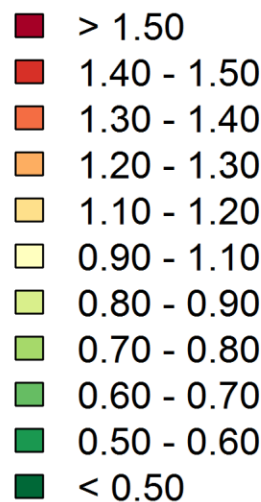

▲ ▼ P < 0.05
