# Supplementary material for: Meta-Profiles of Gene Expression during Aging: Limited Similarities between Mouse and Human and an Unexpectedly Decreased Inflammatory Signature
Source: PubMed Central journal article supplement (PMC3296693; doi:10.1371/journal.pone.0033204), 2012-03-07

# (A) Females Age-increased Genes

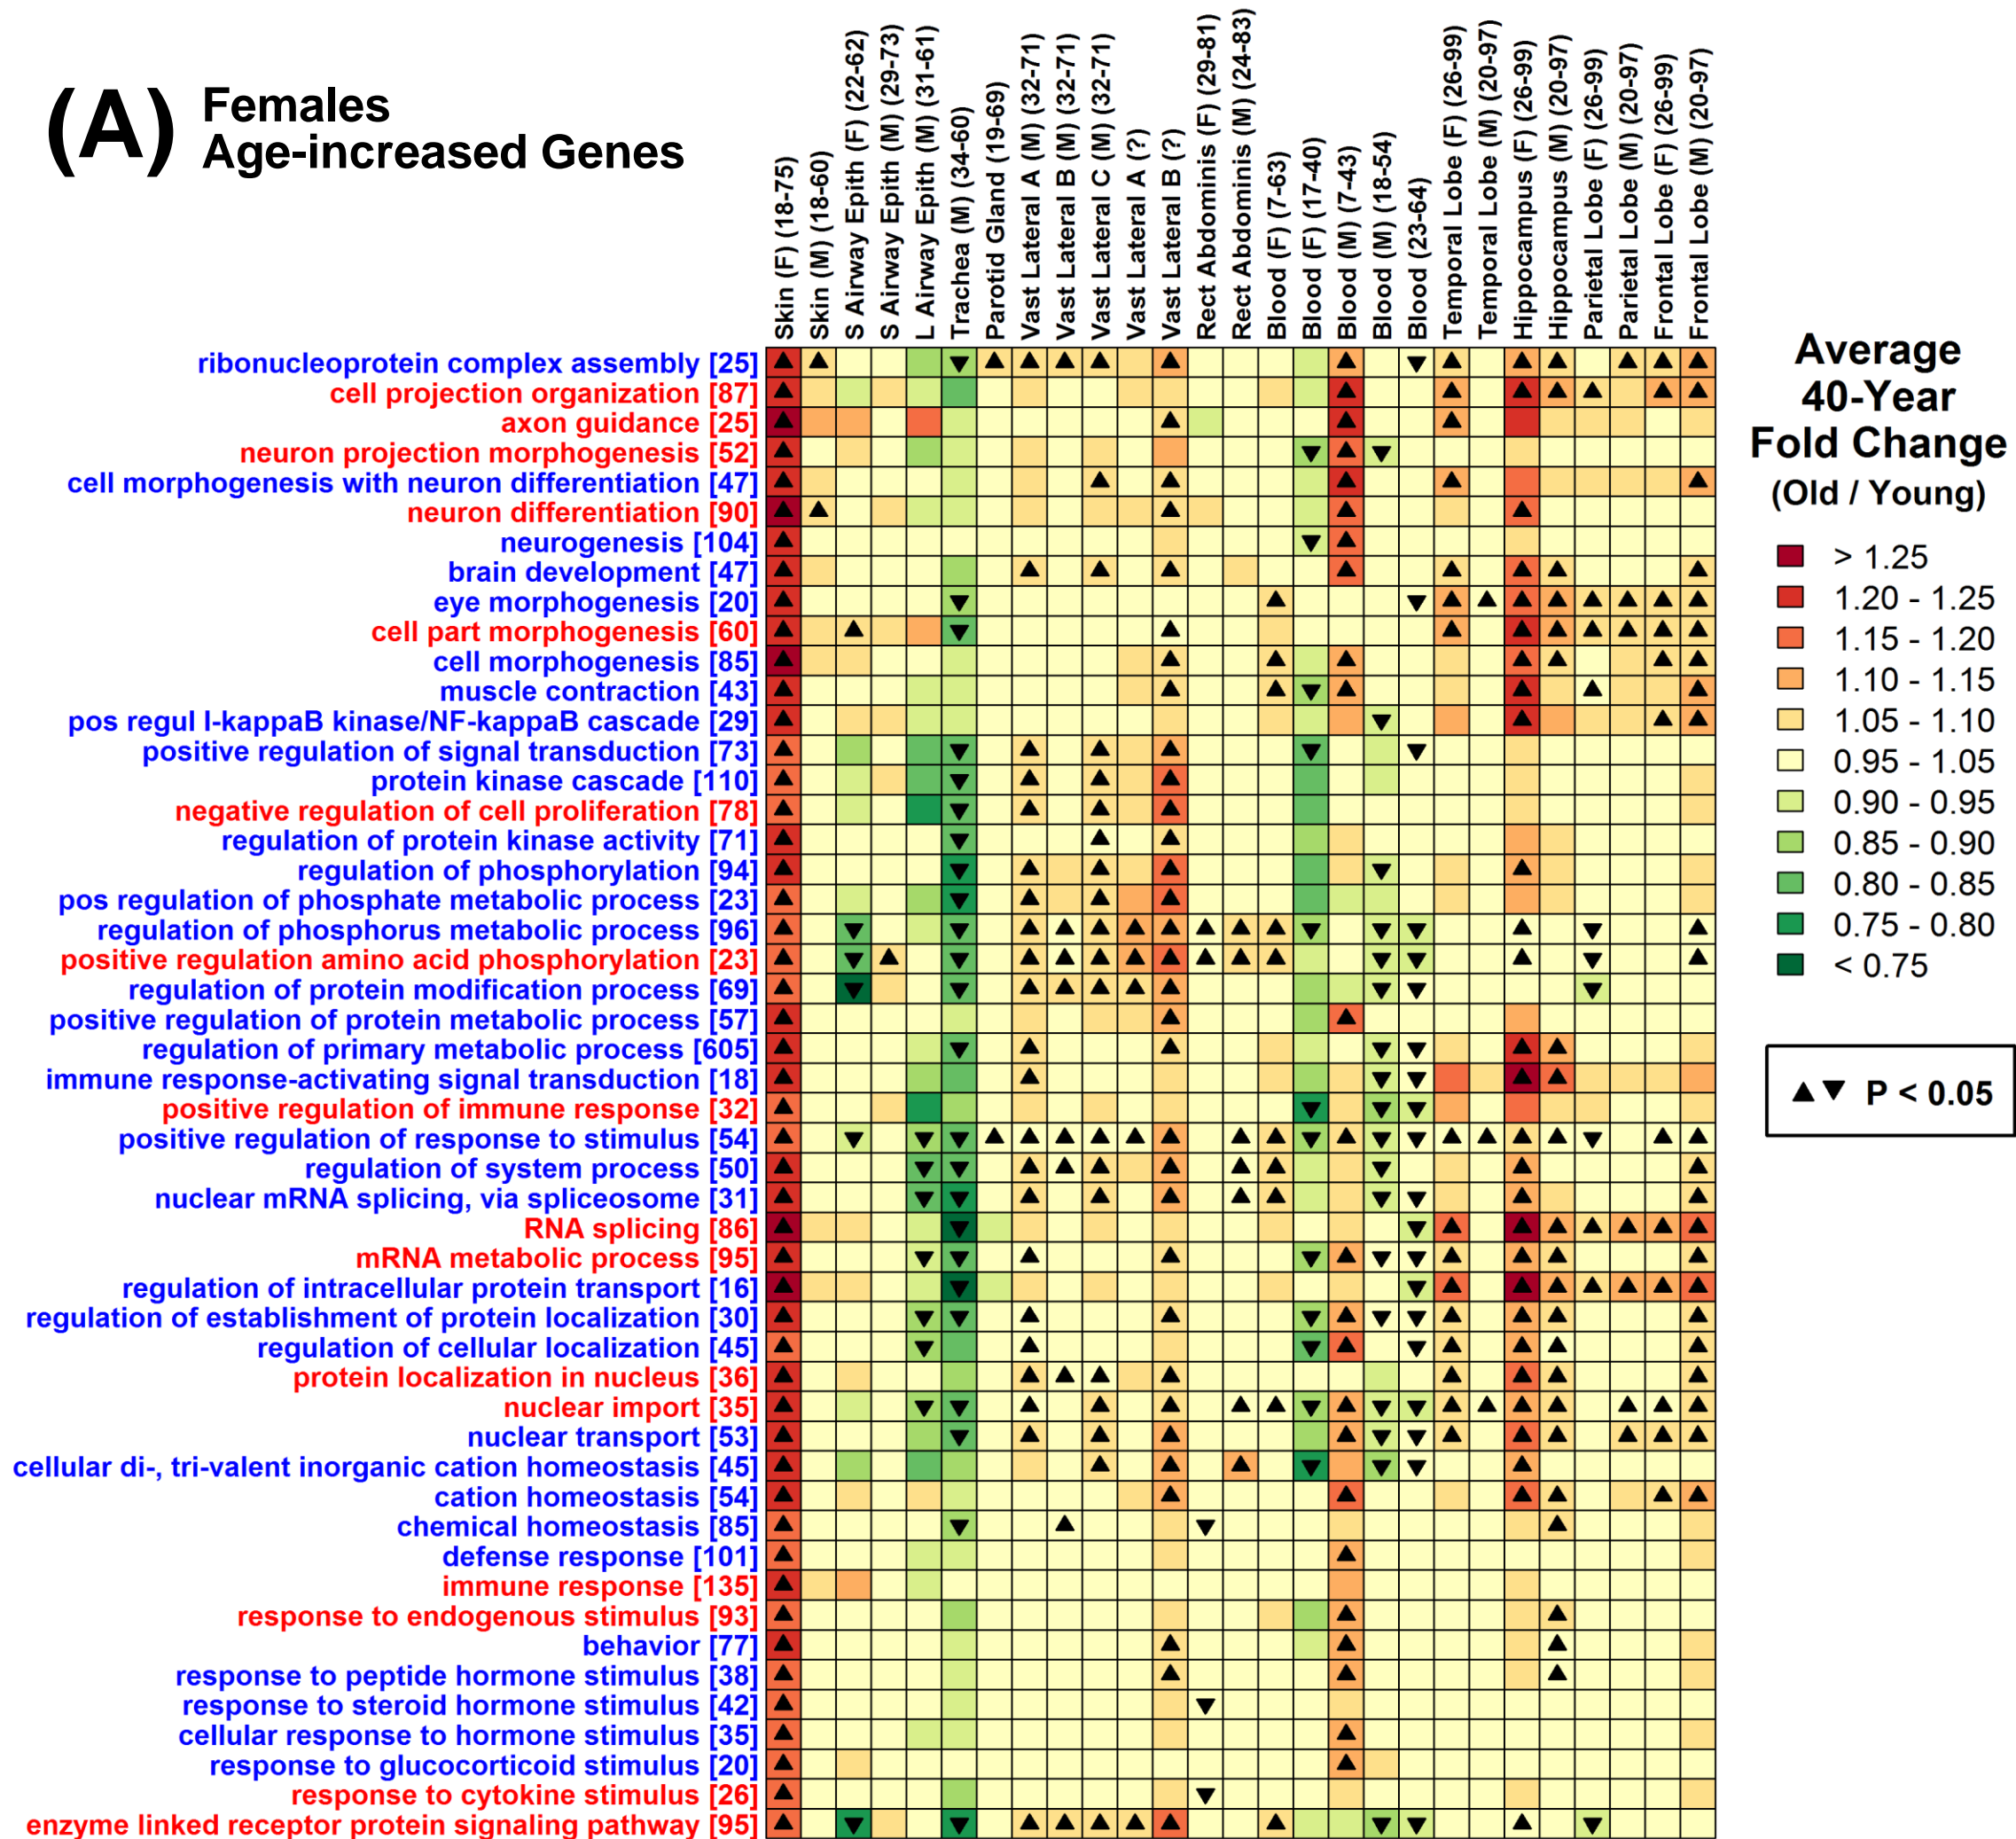

# (B) Females Age-decreased Genes

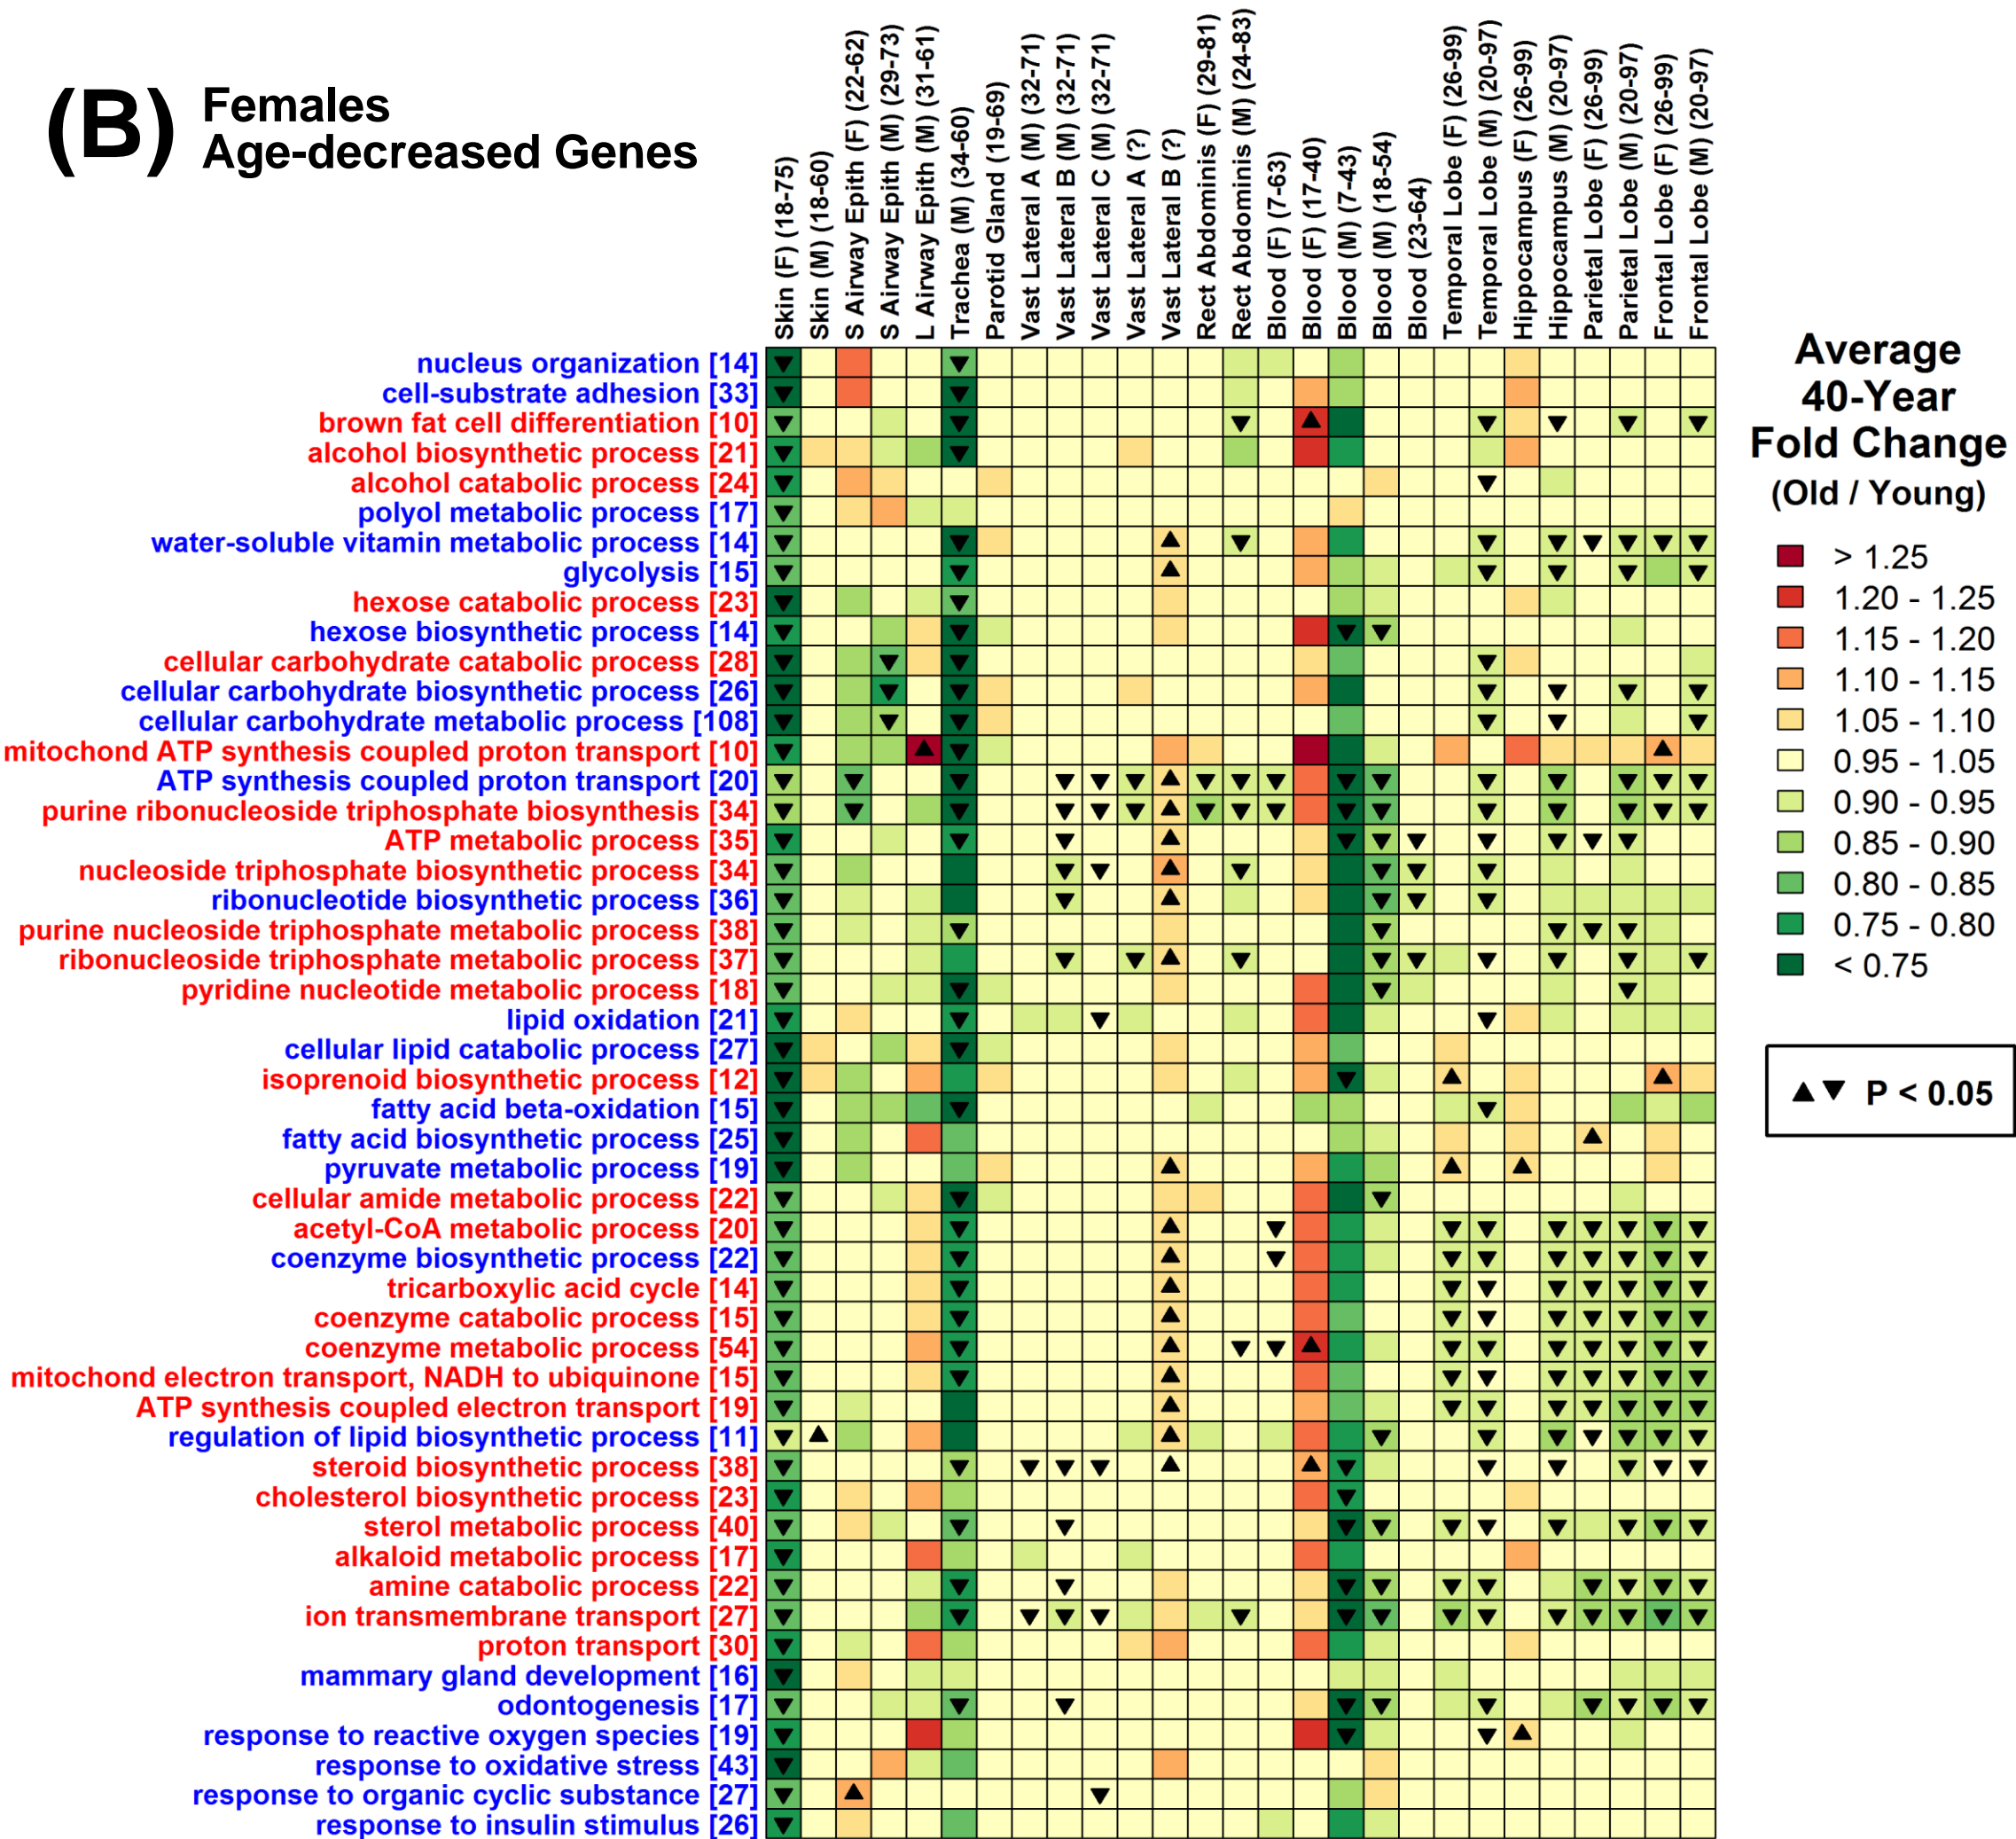

# (C) Males Age-increased Genes

Skin (F) (18-75)  
 Skin (M) (18-60)  
 S Airway Epith (F) (22-62)  
 S Airway Epith (M) (29-73)  
 L Airway Epith (M) (31-61)  
 Trachea (M) (34-60)  
 Parotid Gland (19-69)  
 Vast Lateral A (M) (32-71)  
 Vast Lateral B (M) (32-71)  
 Vast Lateral C (M) (32-71)  
 Vast Lateral A (?)  
 Vast Lateral B (?)  
 Rect Abdominis (F) (29-81)  
 Rect Abdominis (M) (24-83)  
 Blood (F) (7-63)  
 Blood (F) (17-40)  
 Blood (M) (7-43)  
 Blood (M) (18-54)  
 Blood (23-64)  
 Temporal Lobe (F) (26-99)  
 Temporal Lobe (M) (20-97)  
 Hippocampus (F) (26-99)  
 Hippocampus (M) (20-97)  
 Parietal Lobe (F) (26-99)  
 Parietal Lobe (M) (20-97)  
 Frontal Lobe (F) (26-99)  
 Frontal Lobe (M) (20-97)

**Average  
40-Year  
Fold Change  
(Old / Young)**

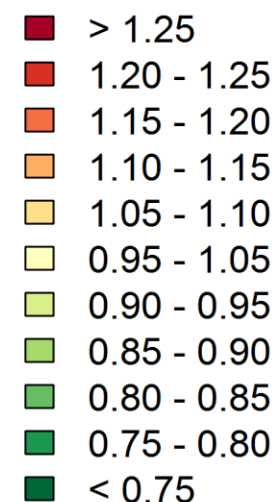

▲ ▼ P < 0.05

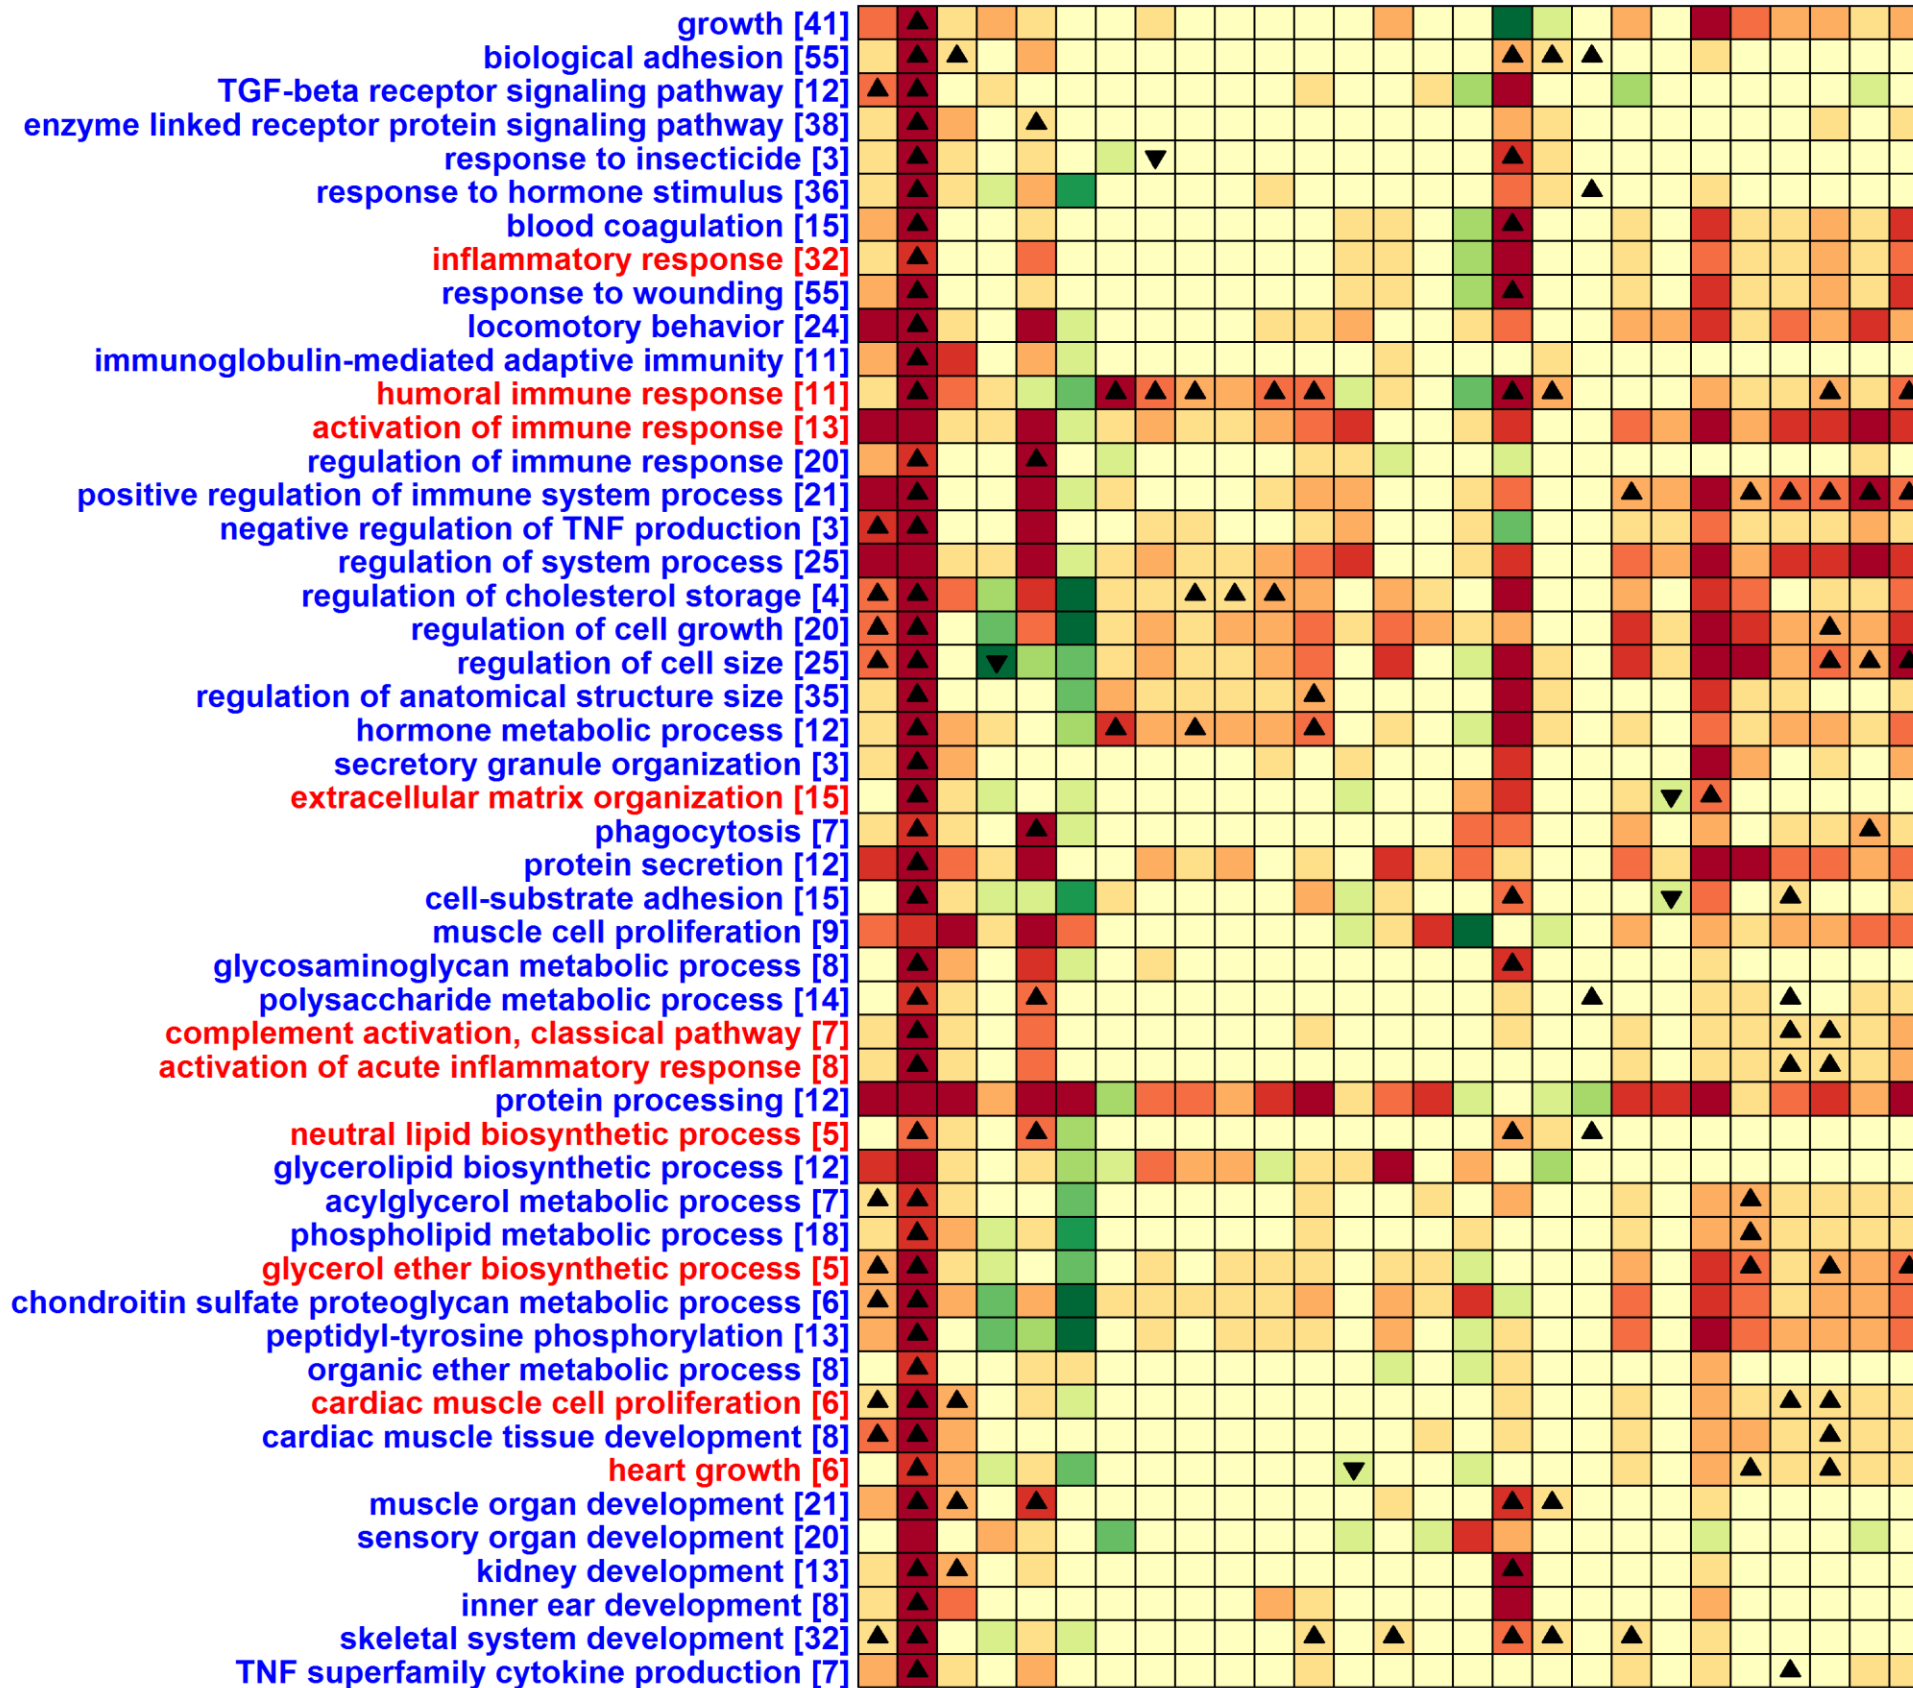

Supplement: pone.0033204.s002.pdf [file pone.0033204.s002.pdf]
