# Supplementary material for: Meta-Profiles of Gene Expression during Aging: Limited Similarities between Mouse and Human and an Unexpectedly Decreased Inflammatory Signature
Source: PubMed Central journal article supplement (PMC3296693; doi:10.1371/journal.pone.0033204), 2012-03-07
Supplement: pone.0033204.s011.pdf [file pone.0033204.s011.pdf]

# (C) Males Age-increased Genes

Skin(F)(CB6F1)  
 Skin(M)(CB6F1)  
 Lung(F)(B6)  
 Lung(M)(B6)  
 Lung(M)(DBA)  
 Liver(F)(B6)  
 Liver(M)(Ames)  
 Liver(M)(B6)  
 Liver(M)(B6)  
 Kidney(F)(B6)  
 Spleen(F)(B6)  
 Aorta(M)(B6)  
 Muscle(M)(B6C3F1)  
 Heart(M)(B6C3F1)  
 HSC(M)  
 GV oocytes(F)(B6SJLF1)  
 M2 oocytes(F)(B6SJLF1)  
 Cochlea(M)(B6)  
 Eye(M)(B6)  
 Eye(B6)  
 Cortex(M)(B6C3F1)  
 Cortex(M)(B6C3HF1)  
 Hippocampus(M)(B6)  
 Cerebellum(M)(B6)  
 Cerebellum(M)(C3H)  
 Cerebellum(M)(B6C3H)  
 Cerebellum(M)(CBA)  
 Cerebellum(M)(BalbC)  
 Cerebellum(M)(X129)  
 Brain(M)(BalbC)

central nervous system neuron axonogenesis [9]  
 neuron projection morphogenesis [50]  
 negative regulation of axonogenesis [8]  
 regulation of neuron projection development [14]  
 cell morphogenesis with neuron differentiation [53]  
 regulation of cell morphogenesis differentiation [14]  
 central nervous system neuron differentiation [14]  
 generation of neurons [90]  
 negative regulation of cell development [14]  
 cell part morphogenesis [54]  
 cell morphogenesis [83]  
 maternal placenta development [4]  
 cell aging [12]  
 oocyte development [8]  
 gamete generation [57]  
 chromatin remodeling [9]  
 chromatin modification [68]  
 neurofilament cytoskeleton organization [8]  
 cell projection organization [82]  
 microspike assembly [7]  
 cell junction assembly [9]  
 endomembrane system organization [8]  
 cell-cell adhesion mediated by integrin [4]  
 protein polyubiquitination [9]  
 regulation of protein modification process [36]  
 ubiquitin-dependent protein catabolic process [31]  
 glycosphingolipid biosynthetic process [3]  
 9-cis-retinoic acid biosynthetic process [3]  
 regulation of protein metabolic process [64]  
 negative regulation of macromolecule metabolism [83]  
 regulation of macromolecule biosynthetic process [365]  
 positive regulation of actin filament polymerization [5]  
 positive regulation of protein complex assembly [7]  
 positive regulation of cell-cell adhesion [5]  
 regulation of Rho protein signal transduction [26]  
 reg small GTPase mediated signal transduct [58]  
 Ras protein signal transduction [40]  
 T cell receptor signaling pathway [9]  
 immune response-activating receptor signaling [11]  
 activation of immune response [18]  
 membrane organization [68]  
 amino acid import [5]  
 acidic amino acid transport [8]  
 L-glutamate import [5]  
 cytoskeleton-dependent intracellular transport [10]  
 Golgi vesicle transport [15]  
 associative learning [9]  
 learning or memory [22]  
 response to UV [12]  
 response to acid [8]

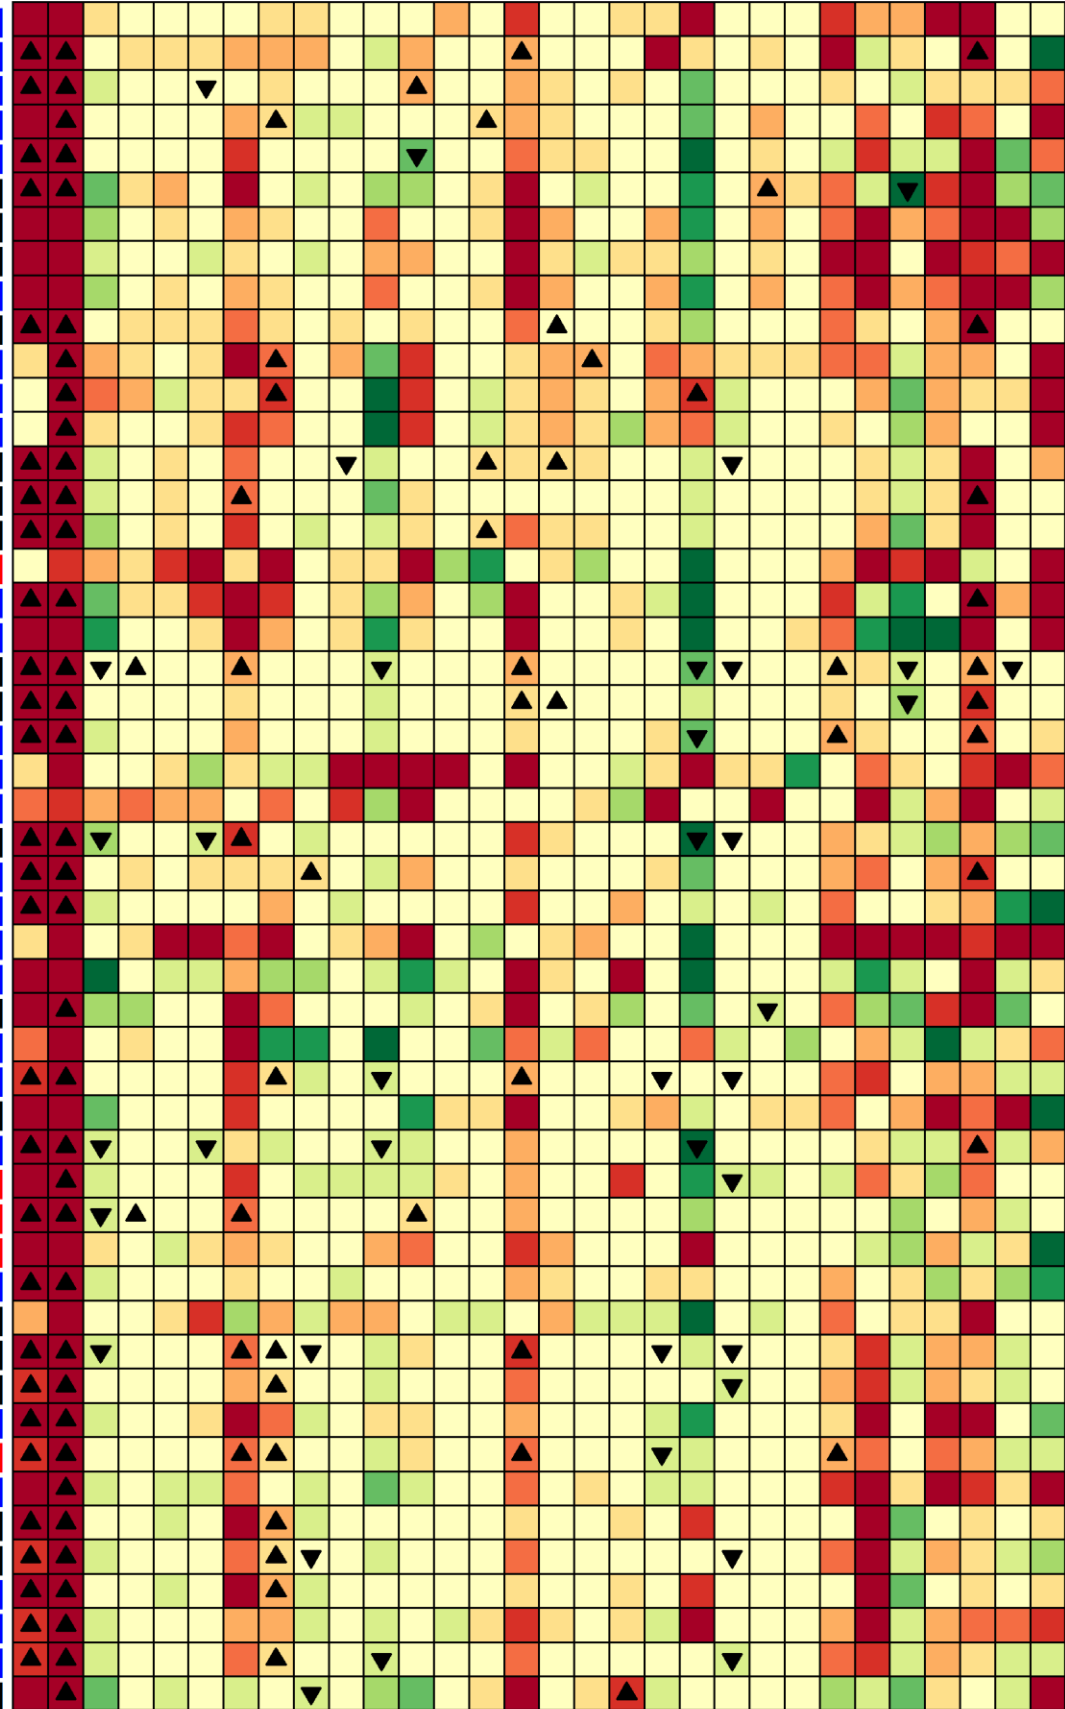

**Average  
 2-Year  
 Fold Change  
 (Old / Young)**

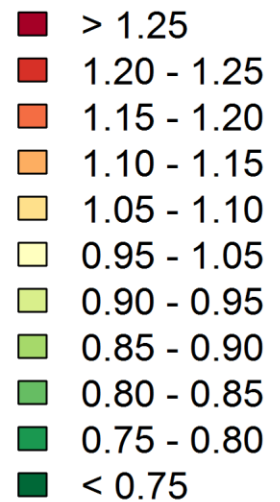

▲ ▼ P < 0.05
