# Supplementary material for: Meta-Profiles of Gene Expression during Aging: Limited Similarities between Mouse and Human and an Unexpectedly Decreased Inflammatory Signature
Source: PubMed Central journal article supplement (PMC3296693; doi:10.1371/journal.pone.0033204), 2012-03-07

# Intergenic Non-Coding Sequences

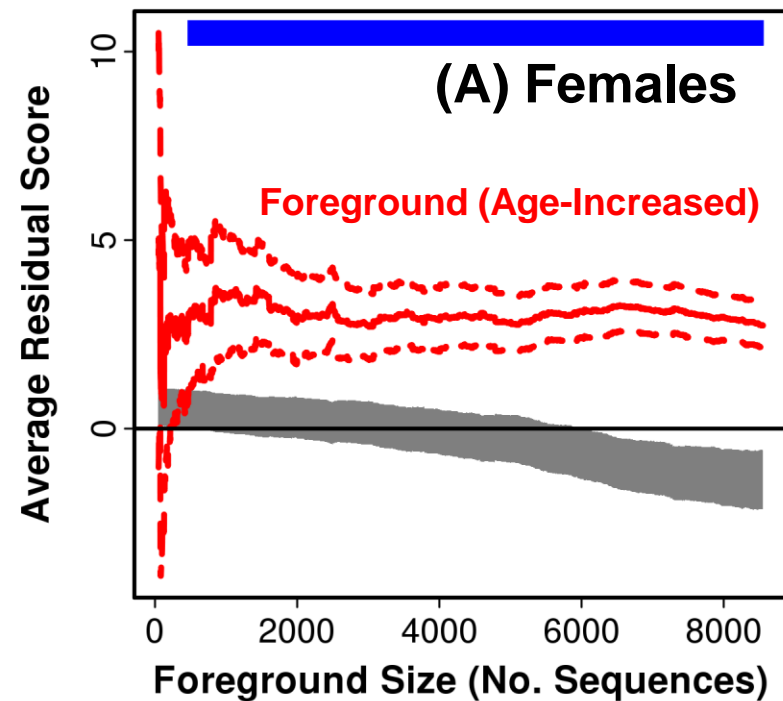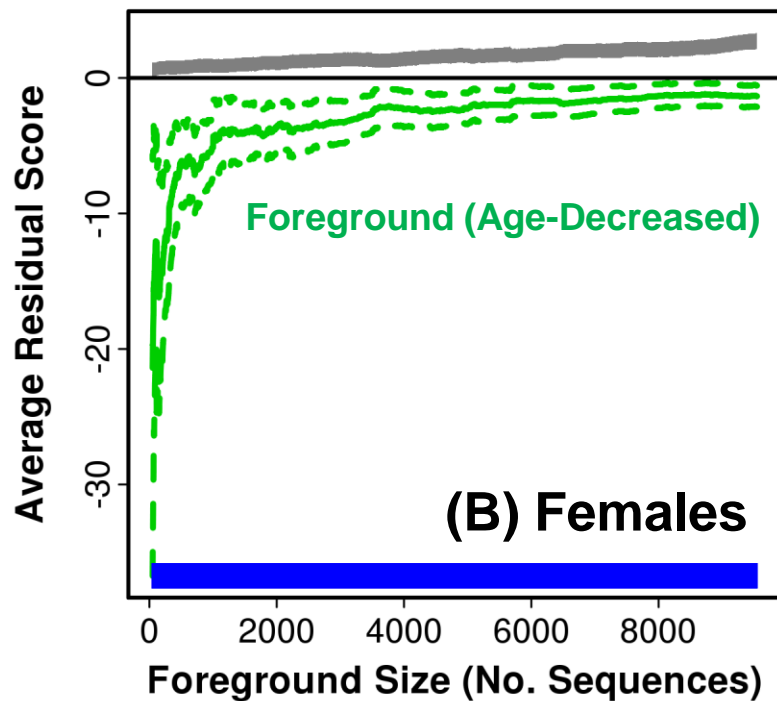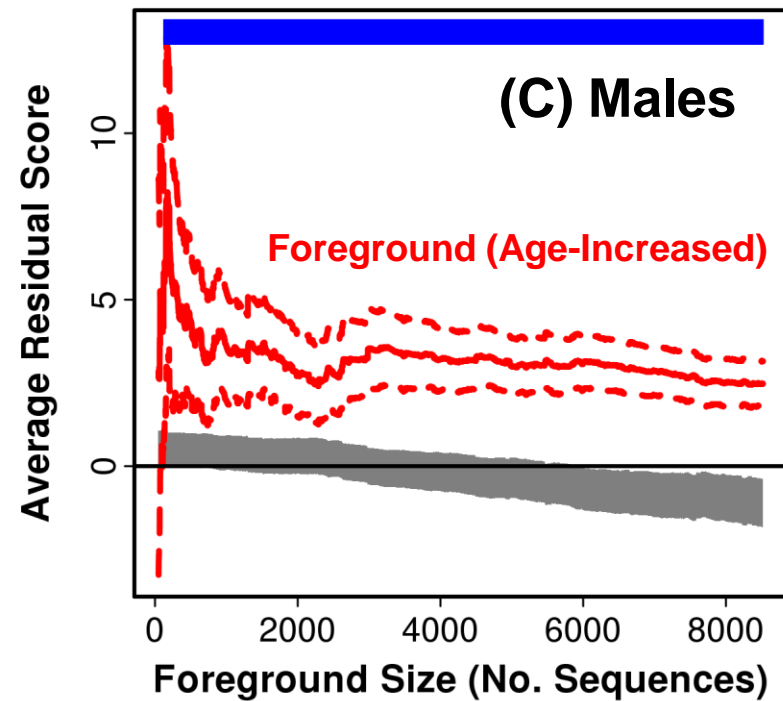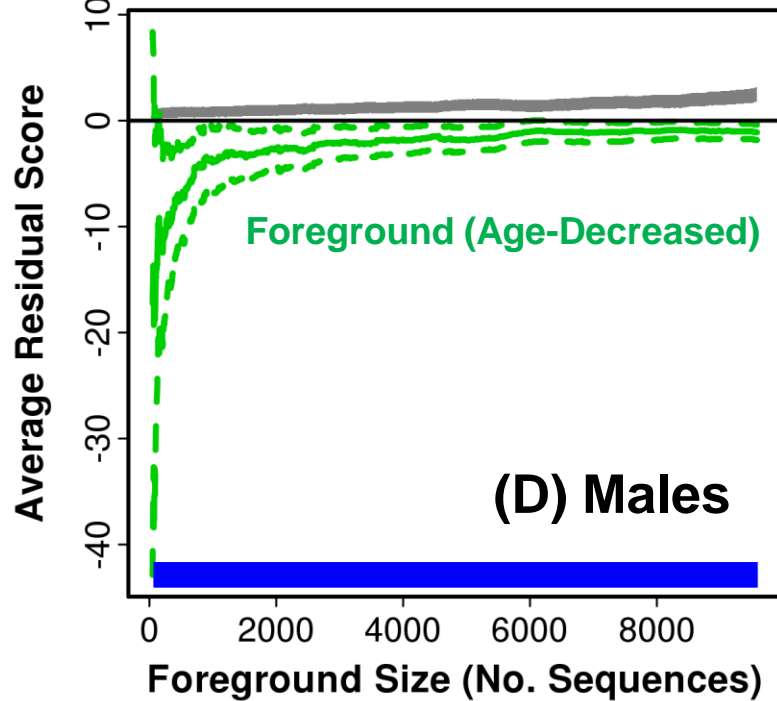

# Intronic Sequences

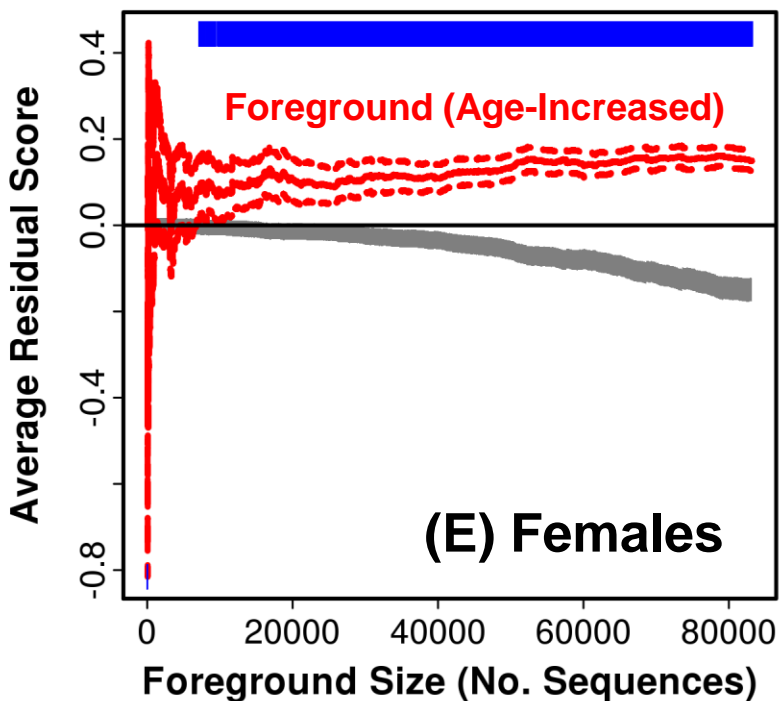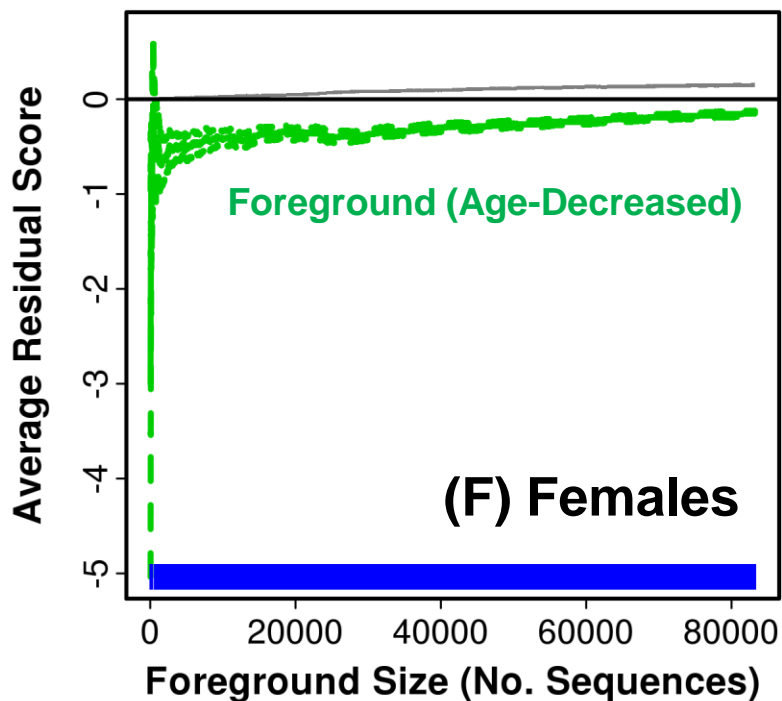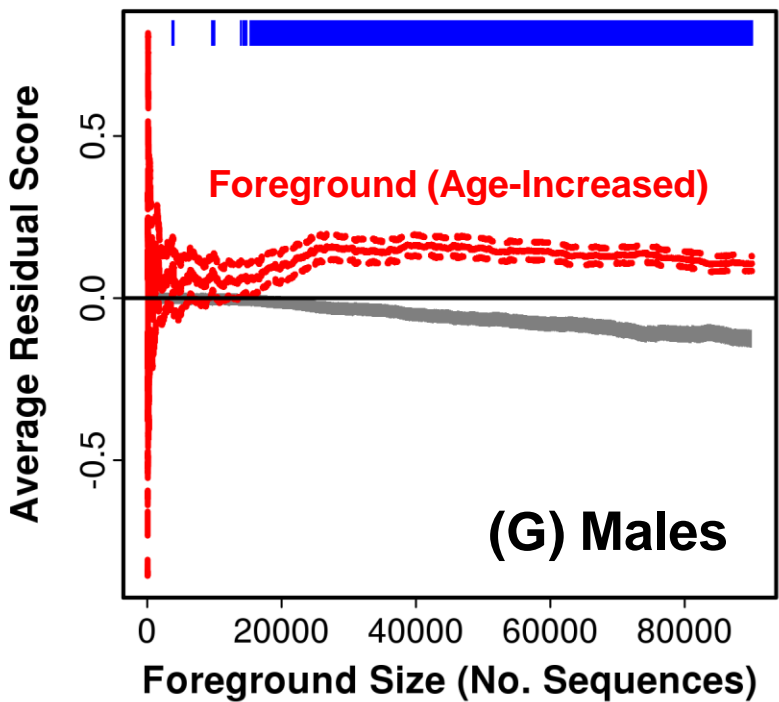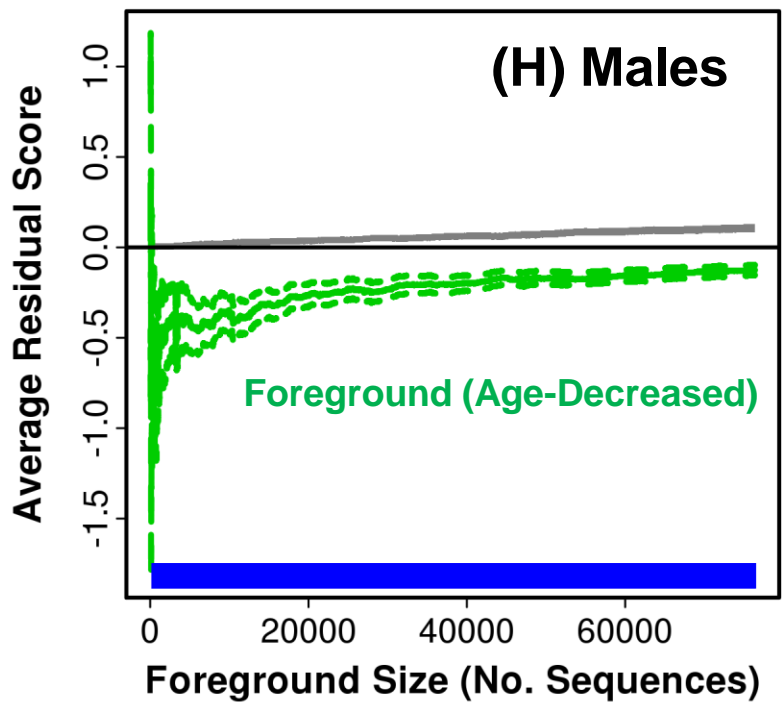

# Conserved Sequences (2000 BP Upstream TSS)

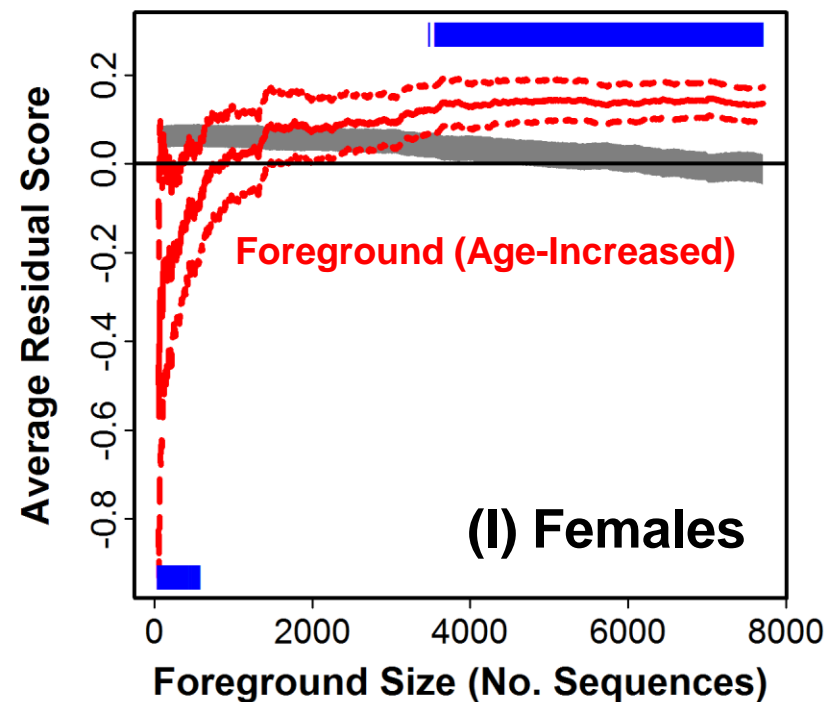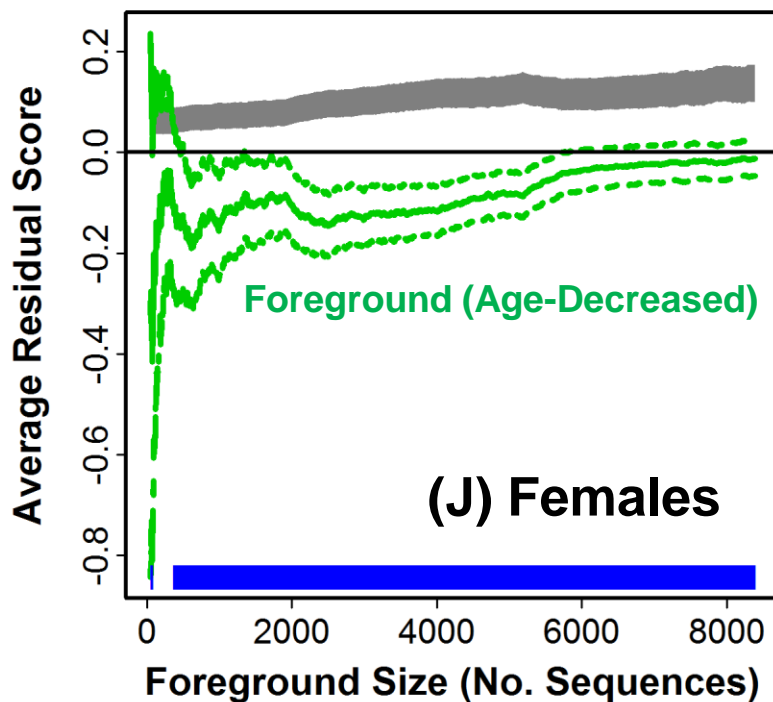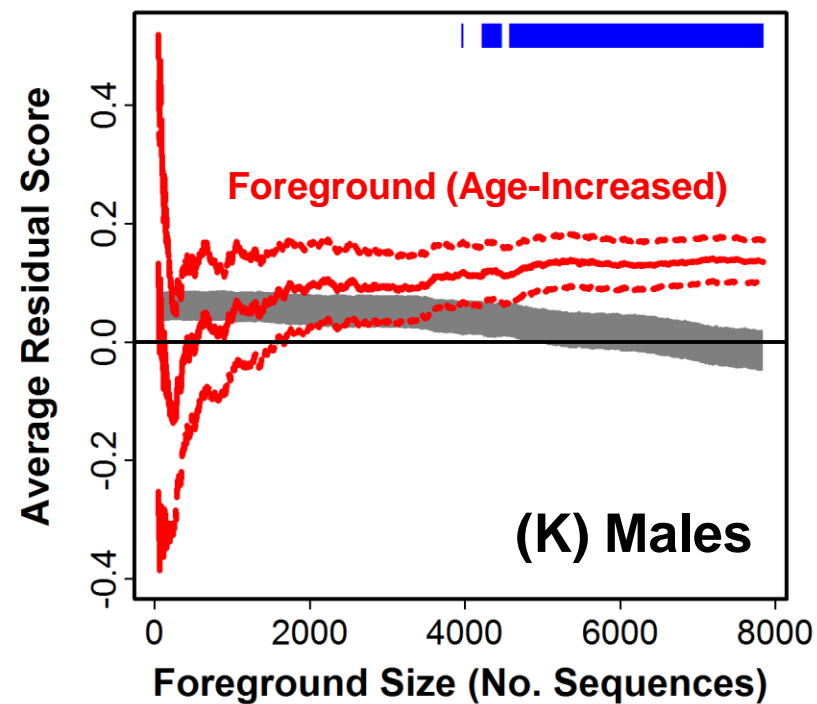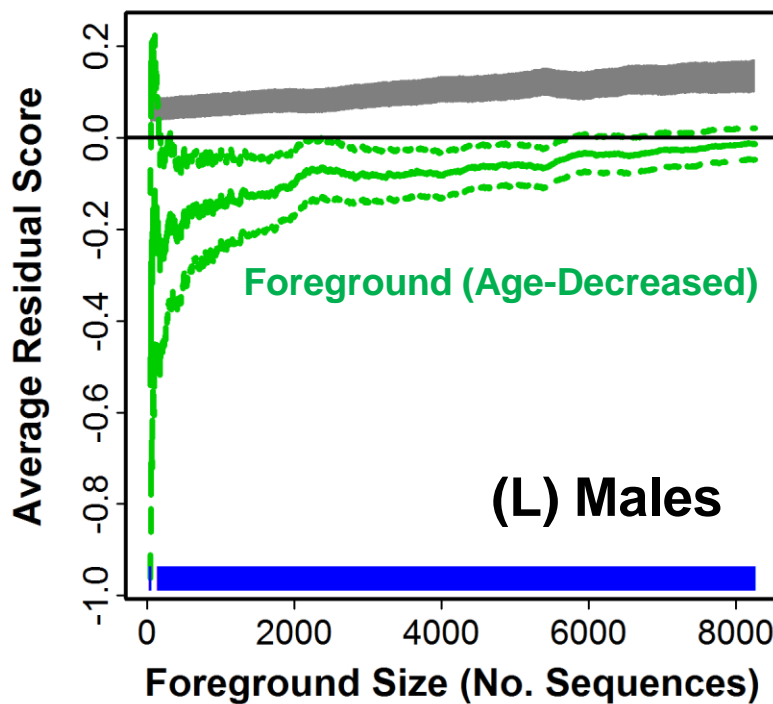

Supplement: pone.0033204.s017.pdf [file pone.0033204.s017.pdf]
