# Supplementary material for: Meta-Profiles of Gene Expression during Aging: Limited Similarities between Mouse and Human and an Unexpectedly Decreased Inflammatory Signature
Source: PubMed Central journal article supplement (PMC3296693; doi:10.1371/journal.pone.0033204), 2012-03-07

# (A) Similar Aging Effects in Humans and Mice

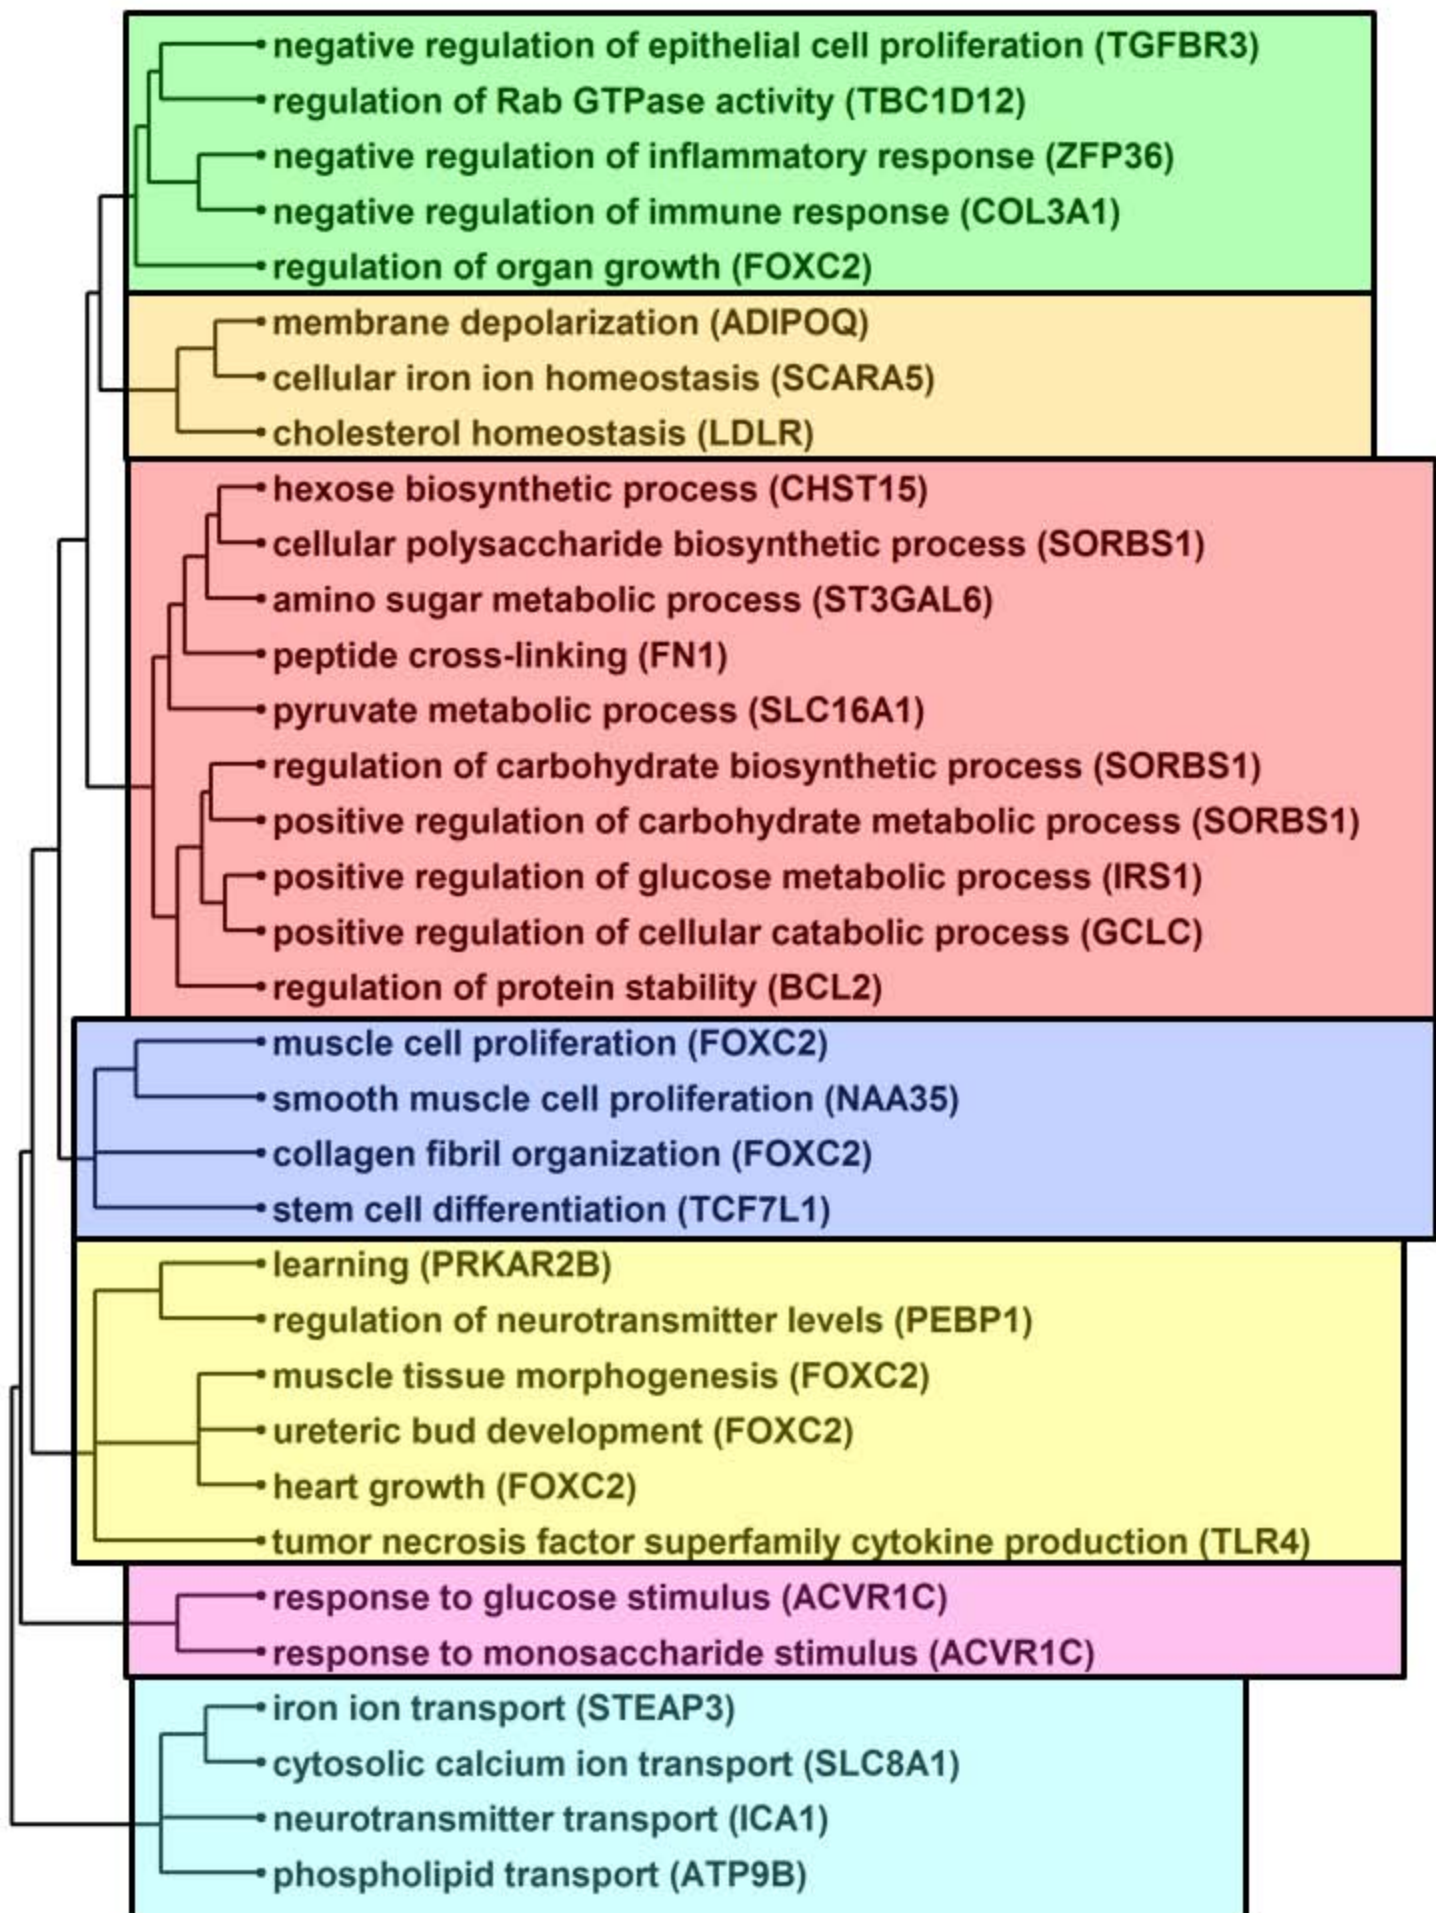

## (B) Disimilar Aging Effects in Humans and Mice

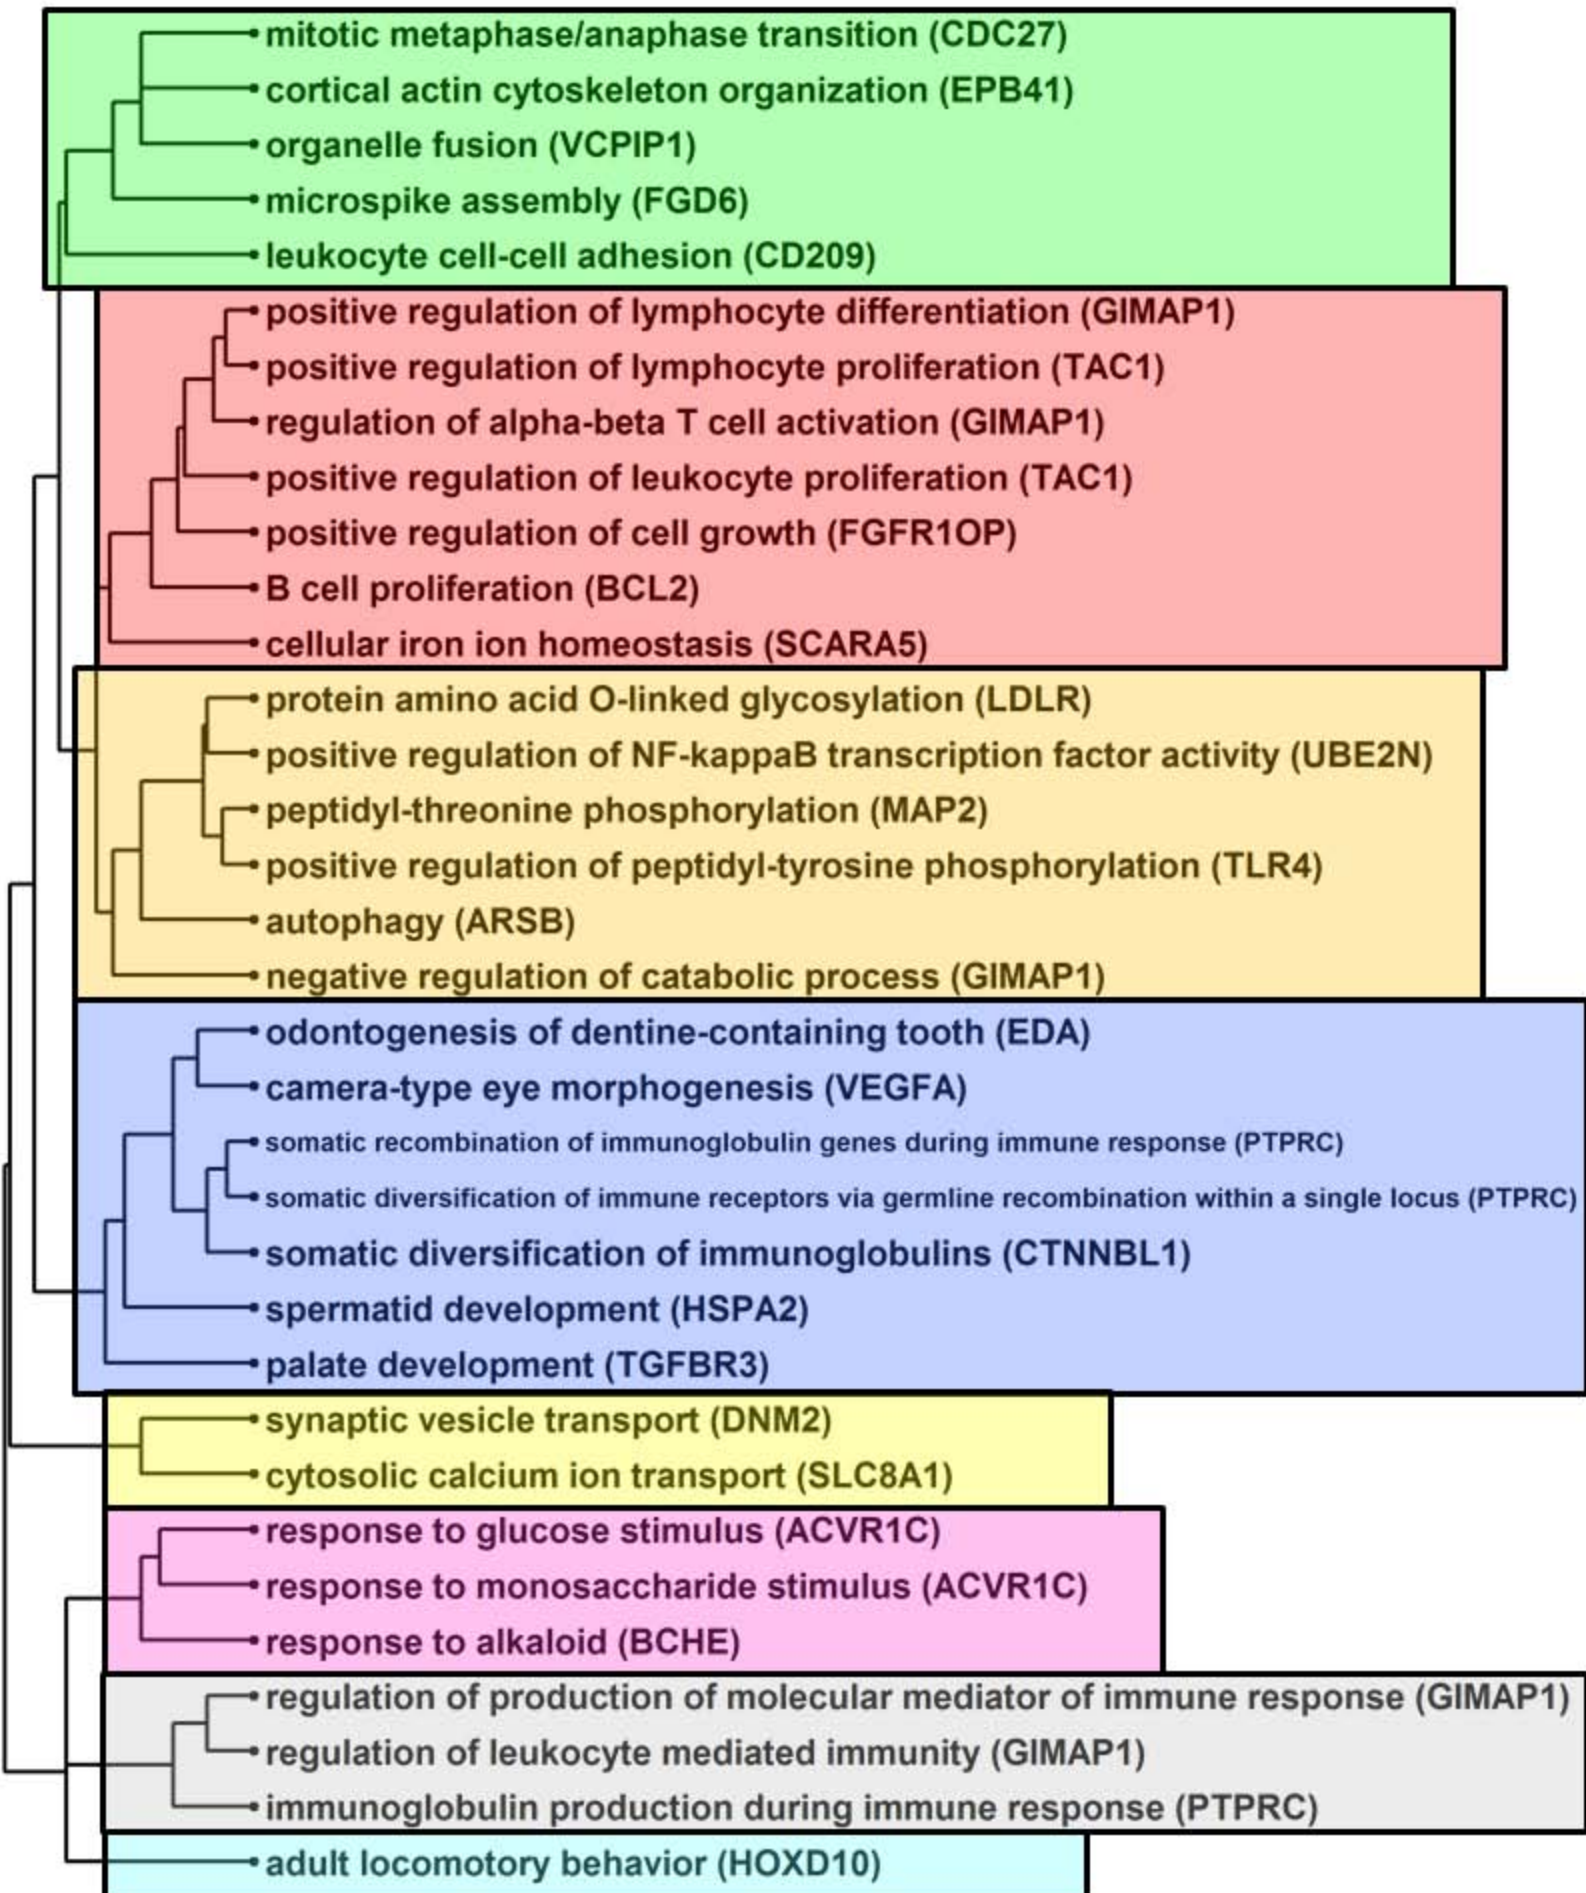

### (C) Females – GO BP terms associated with similar aging effects

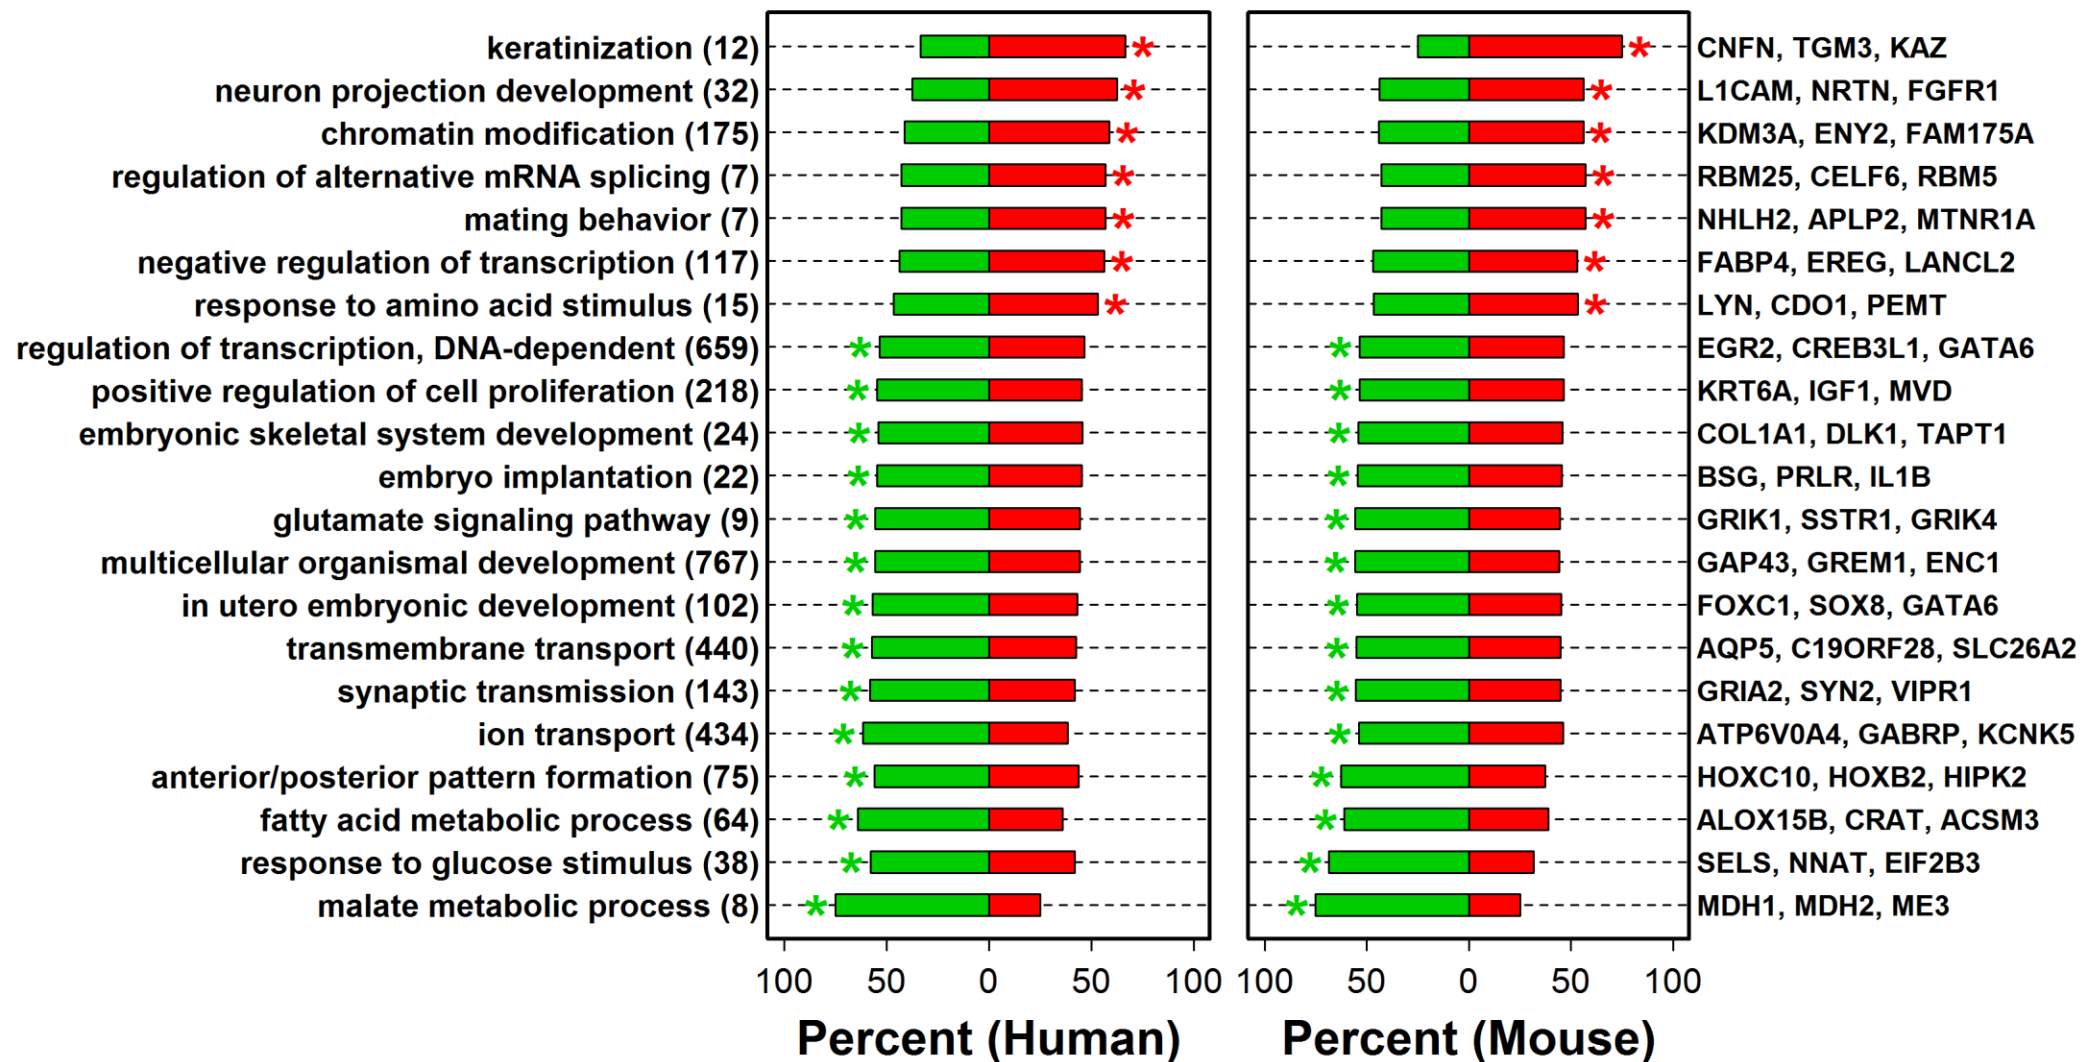

## (D) Females – GO BP terms associated with dissimilar aging effects

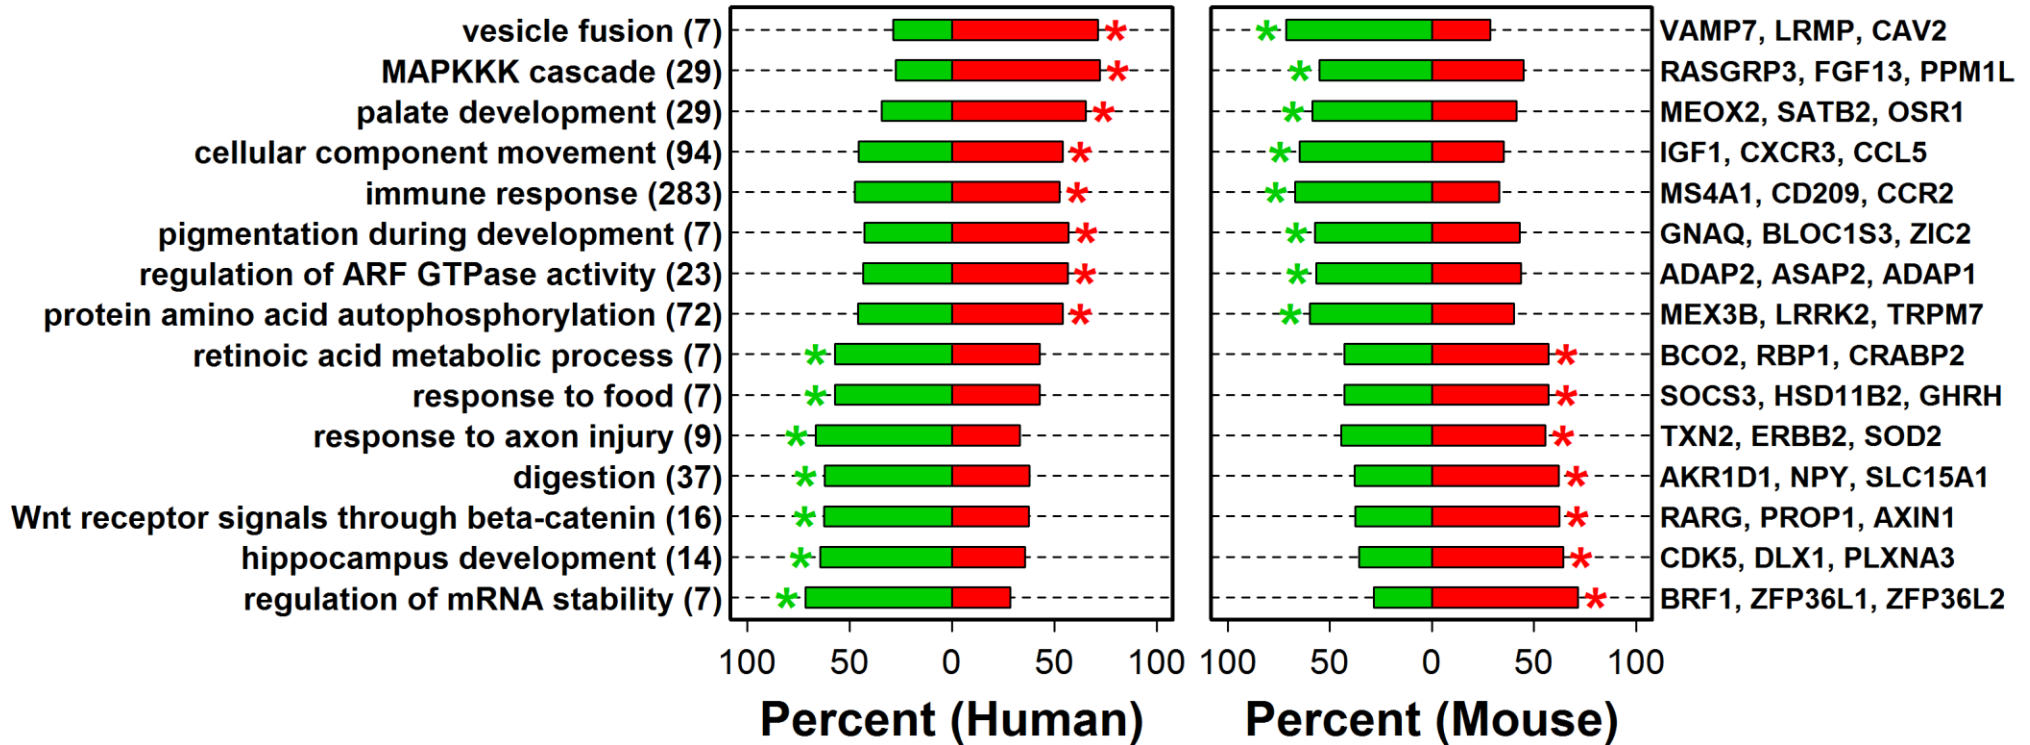

## (E) Males – GO BP terms associated with similar aging effects

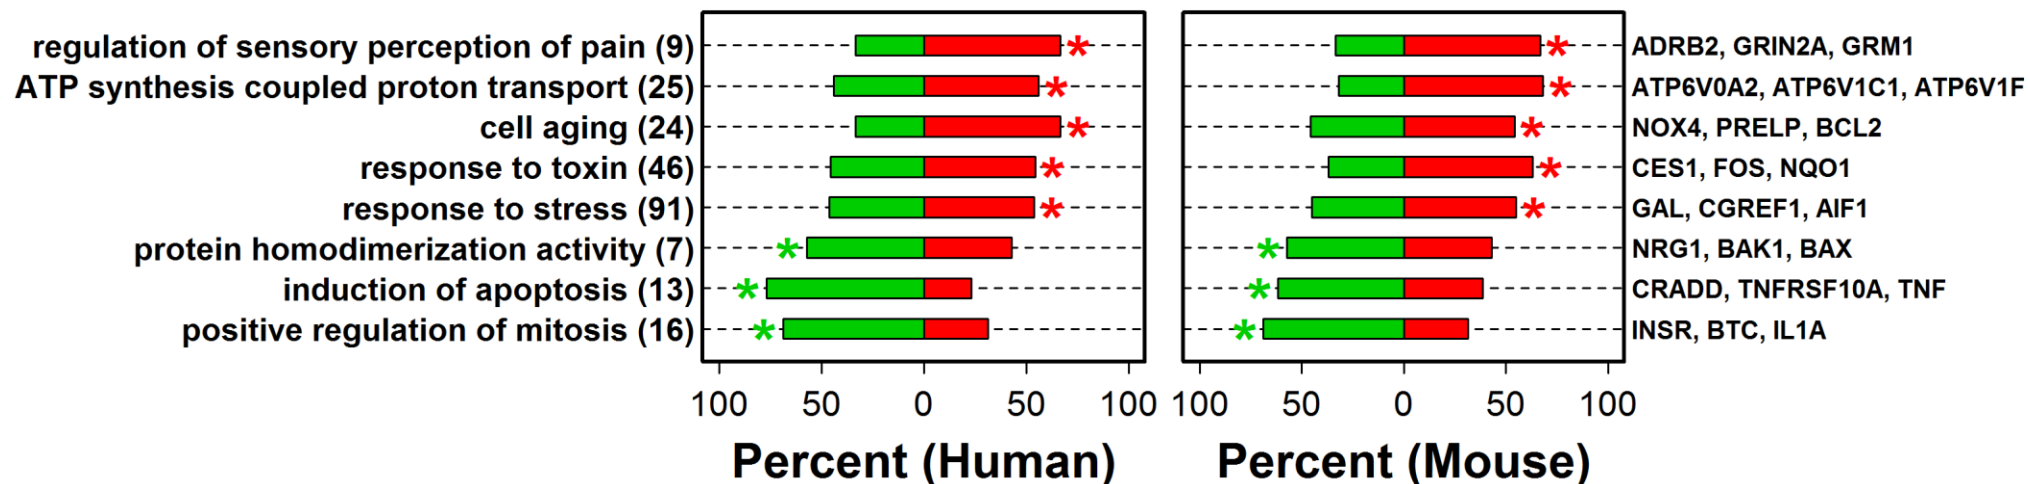

## (F) Males – GO BP terms associated with dissimilar aging effects

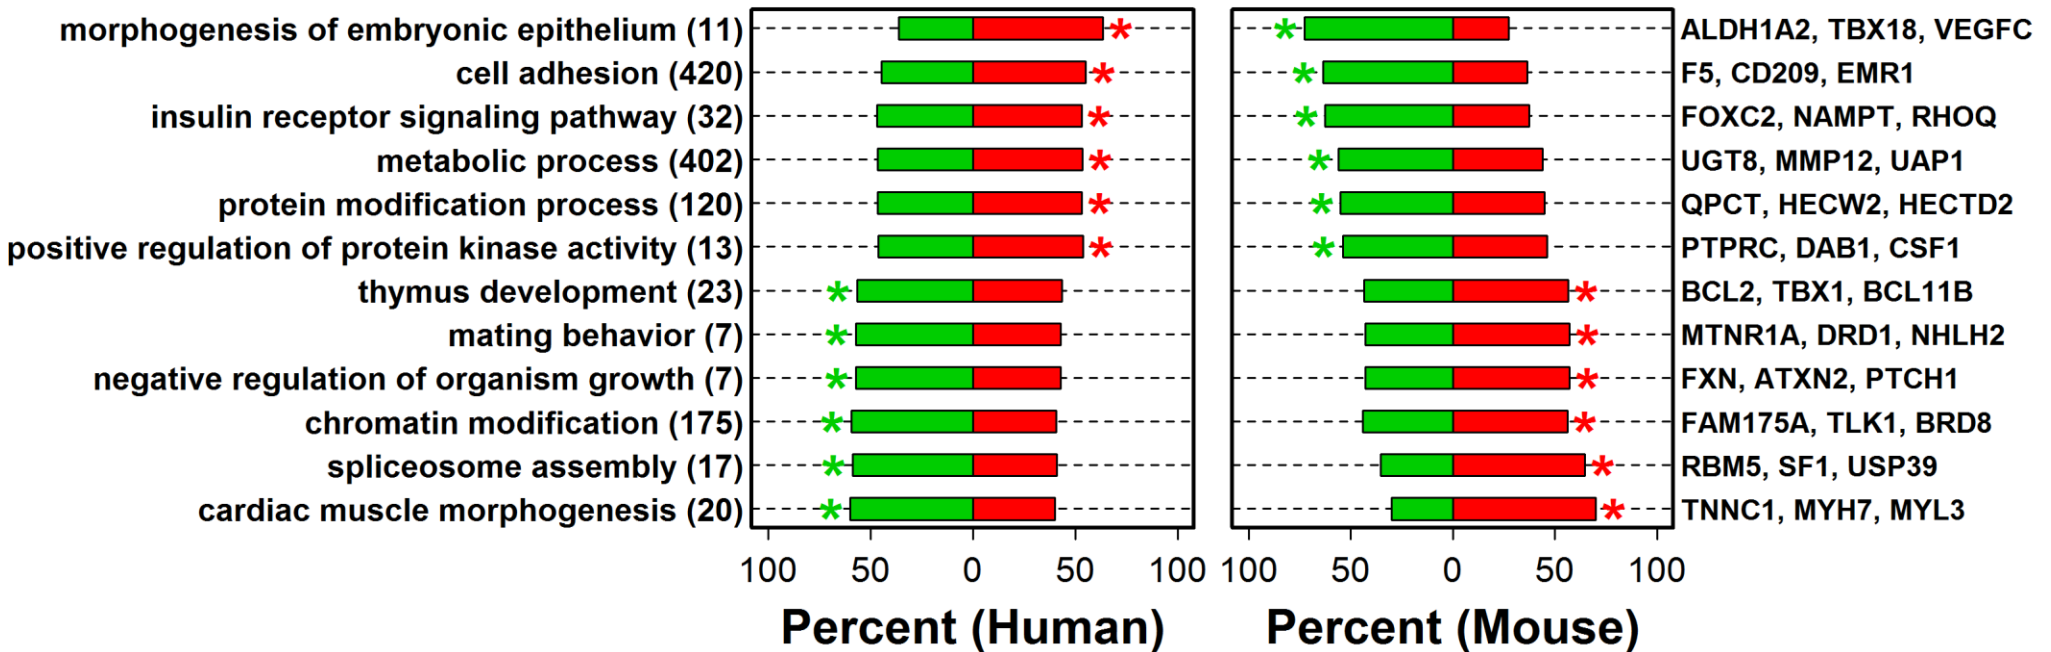

Supplement: pone.0033204.s019.pdf [file pone.0033204.s019.pdf]
