# Supplementary material for: Meta-Profiles of Gene Expression during Aging: Limited Similarities between Mouse and Human and an Unexpectedly Decreased Inflammatory Signature
Source: PubMed Central journal article supplement (PMC3296693; doi:10.1371/journal.pone.0033204), 2012-03-07
Supplement: pone.0033204.s023.pdf [file pone.0033204.s023.pdf]

**Table S3. Empirical estimates of nucleotide frequency background distributions (human hg19 and mouse mm9).** Human and mouse genomes were searched to identify matches with respect to position weight matrices representing motifs associated with known mammalian transcription factors. Position weight matrices were calculated using region-specific estimates of the nucleotide frequency background distribution. For each region, the background frequency distribution was estimated genome-wide, using all identified sequences 2000 BP upstream / 200 BP downstream of transcription start sites (TSSs), non-coding intergenic sequences (repeat-masked), intronic sequences (repeat-masked), or conserved sequences 2000 BP upstream of TSSs (from UCSC multiple alignments of vertebrate genomes).

| Species | Genome Region                                                  | A     | C     | G     | T     |
|---------|----------------------------------------------------------------|-------|-------|-------|-------|
| Human   | 2000 BP upstream of TSS, 200 BP downstream of TSS <sup>1</sup> | 0.247 | 0.251 | 0.254 | 0.248 |
|         | Non-coding intergenic sequence <sup>2</sup>                    | 0.300 | 0.200 | 0.200 | 0.300 |
|         | Intronic sequence <sup>2</sup>                                 | 0.297 | 0.202 | 0.202 | 0.298 |
|         | Conserved 2000 BP upstream of TSS <sup>2</sup>                 | 0.252 | 0.249 | 0.248 | 0.251 |
| Mouse   | 2000 BP upstream of TSS, 200 BP downstream of TSS <sup>3</sup> | 0.255 | 0.243 | 0.246 | 0.256 |
|         | Non-coding intergenic sequence <sup>4</sup>                    | 0.298 | 0.202 | 0.202 | 0.298 |
|         | Intronic sequence <sup>4</sup>                                 | 0.289 | 0.211 | 0.211 | 0.289 |
|         | Conserved 2000 BP upstream of TSS <sup>4</sup>                 | 0.264 | 0.237 | 0.237 | 0.262 |

<sup>1</sup>Background frequencies were used in Figure S3, S4 and S5 calculations

<sup>2</sup>Background frequencies were used in Figure S6 calculations

<sup>3</sup>Background frequencies were used in Figure 8, S15 and S16 calculations

<sup>4</sup>Background frequencies were used in Figure S17 calculations
