# Supplementary material for: Meta-Profiles of Gene Expression during Aging: Limited Similarities between Mouse and Human and an Unexpectedly Decreased Inflammatory Signature
Source: PLOS journal article supplement (doi:10.1371/journal.pone.0033204), 2012-03-07

Percent Overlap (Age-regulated Genes)

# (A) Human

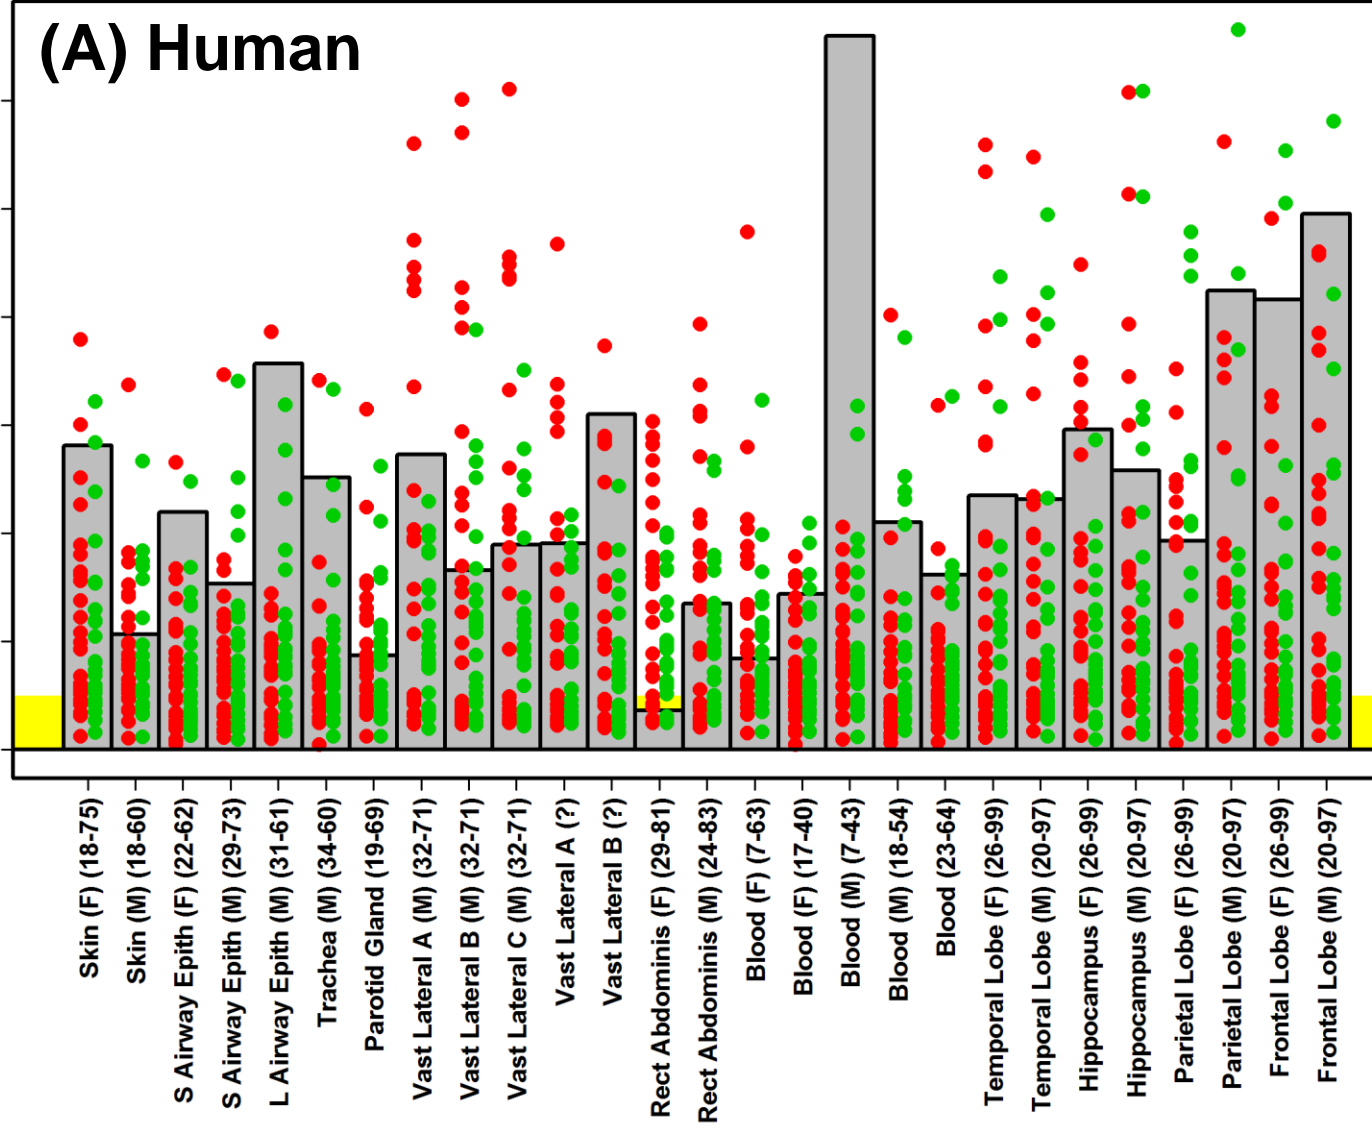

Percent Overlap (Age-regulated Genes)

(B) Mouse

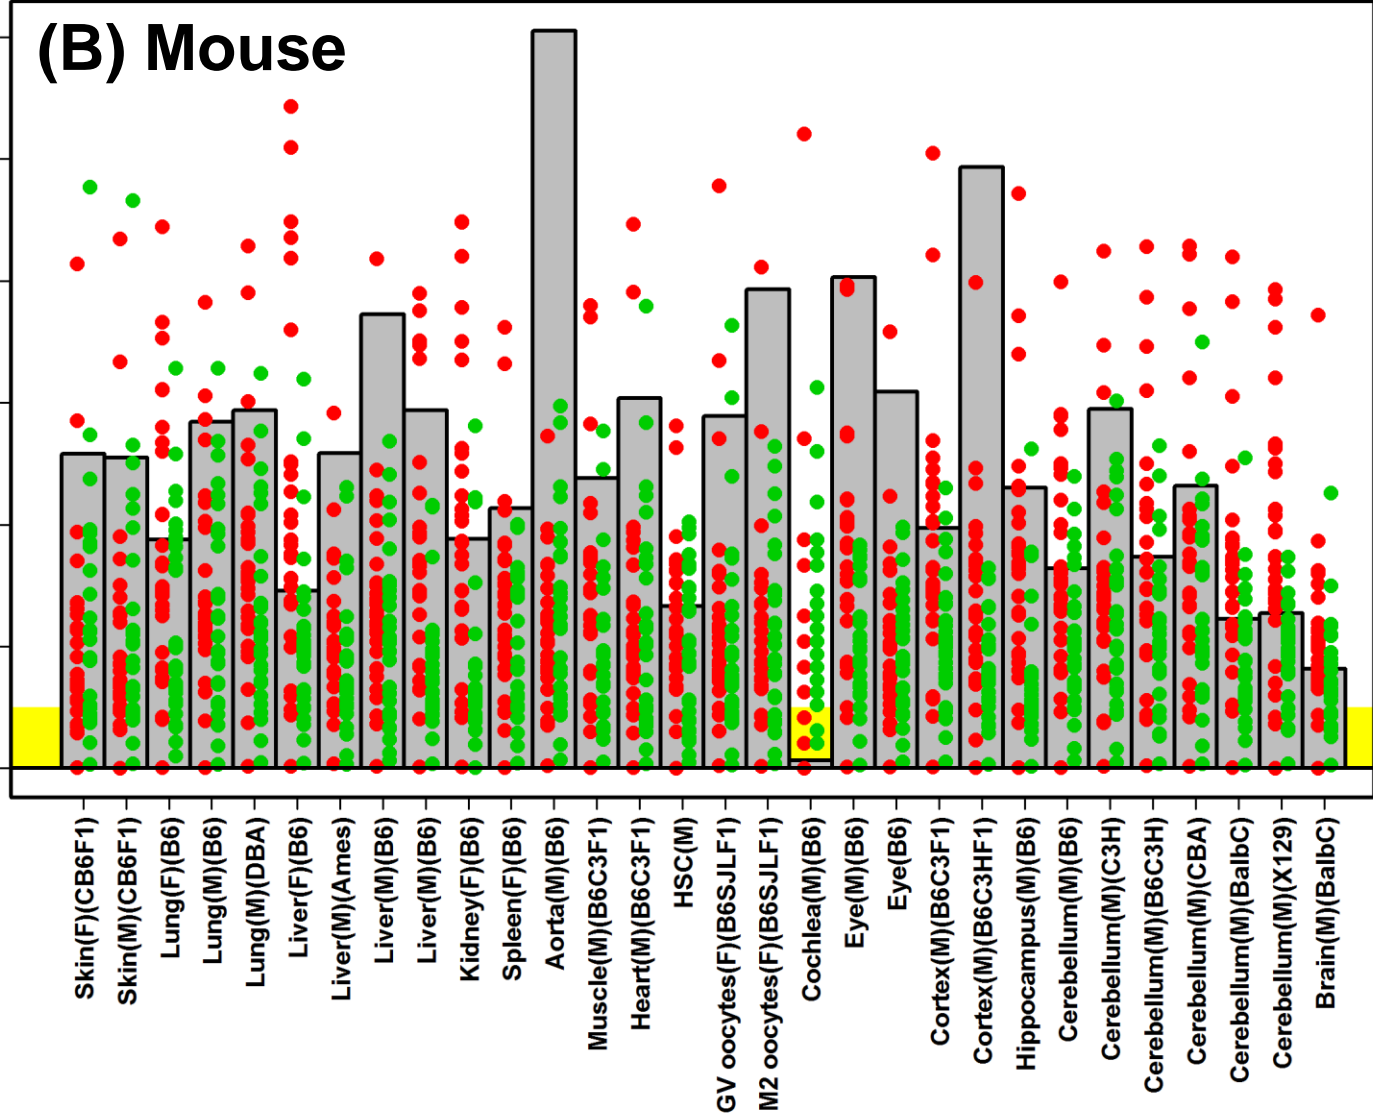

Supplement: S20 (10.1371/journal.pone.0033204.s020) [file journal.pone.0033204.s020]
